## Variation of human neural stem cells generating organizer states *in vitro* before committing to cortical excitatory or inhibitory neuronal fates

Nicola Micali<sup>1,2\*</sup>, Suel-Kee Kim<sup>1,2</sup>, Marcelo Diaz-Bustamante<sup>1</sup>, Genevieve Stein-O'Brien<sup>1,3</sup>, Seungmae Seo<sup>1</sup>, Joo-Heon Shin<sup>1</sup>, Brian G. Rash<sup>2</sup>, Shaojie Ma<sup>4</sup>, Yanhong Wang<sup>1</sup>, Nicolas A. Olivares<sup>1</sup>, Jon Arellano<sup>2</sup>, Kristen R. Maynard<sup>1</sup>, Elana J. Fertig<sup>5,6,7</sup>, Alan J. Cross<sup>8</sup>, Roland Burli<sup>8</sup>, Nicholas J. Brandon<sup>8</sup>, Daniel R. Weinberger<sup>1,3,9,10,11</sup>, Joshua G. Chenoweth<sup>1</sup>, Daniel J. Hoepfner<sup>1,14</sup>, Nenad Sestan<sup>2,4,12</sup>, Pasko Rakic<sup>2,12\*</sup>, Carlo Colantuoni<sup>1,9,11,13\*</sup>, Ronald D. McKay<sup>1\*\*</sup>

1

Lieber Institute for Brain Development, 855 North Wolfe, Baltimore, MD 21205, USA

2

4

12

Department of Neuroscience, Departments of Comparative Medicine, of Genetics, and of Psychiatry, Kavli Institute for Neuroscience, Yale School of Medicine, New Haven, CT 06520, USA

3

5

McKusick-Nathans Institute of Genetic Medicine, Department of Oncology, Sidney Kimmel Comprehensive Cancer

6

7

9

Center, Department of Biomedical Engineering, Department of Applied Mathematics and Statistics, Department of

10

11

Neurology, Department of Psychiatry, Department of Neuroscience, Johns Hopkins School of Medicine, Baltimore, MD 21205, USA

8

AstraZeneca Neuroscience, IMED Biotech Unit, R&D Boston, MA 024515, USA

13

Institute for Genome Sciences, University of Maryland School of Medicine, Baltimore, MD 21201, USA

14

Astellas Research Institute of America, 3565 General Atomics Ct., Ste. 200 San Diego, CA 92121, USA

\*

Corresponding authors: [nicola.micali@yale.edu](mailto:nicola.micali@yale.edu), [pasko.rakic@yale.edu](mailto:pasko.rakic@yale.edu), [ccolantu@jhmi.edu](mailto:ccolantu@jhmi.edu), [ronald.mckay@libd.org](mailto:ronald.mckay@libd.org)

#

Lead contact R.D.M.

**Keywords:** Neural stem cell, FGF2, BMP, neural transcriptional dynamics, neurogenesis, EGFR, patterning of the cortex, neuronal trajectory variation, brain organizer, glutamatergic neurons, inhibitory neurons, human iPSC variation.

## SUMMARY

Better understanding the progression of neural stem cells (NSCs) in the developing cerebral cortex is important for modeling neurogenesis and defining the pathogenesis of neuropsychiatric disorders. Here we used RNA-sequencing, cell imaging and lineage tracing of mouse and human *in vitro* NSCs to model the generation of cortical neuronal fates. We show that conserved signaling mechanisms regulate the acute transition from proliferative NSCs to committed glutamatergic excitatory neurons. As human telencephalic NSCs developed from pluripotency *in vitro*, they first transitioned through organizer states that spatially pattern the cortex before generating glutamatergic precursor fates. NSCs derived from multiple human pluripotent lines varied in these early patterning states leading differentially to dorsal or ventral telencephalic fates. This work furthers systematic analysis of the earliest patterning events that generate the major neuronal trajectories of the human telencephalon.

## INTRODUCTION

Defining how cell types emerge in the forebrain is central to understanding the origins of normal and pathological function in the cerebral cortex (Geschwind and Rakic, 2013; Kwan et al., 2012b; Lein et al., 2017; Nowakowski et al., 2017; Sandberg et al., 2016; Wamsley and Fishell, 2017). The neocortex in mammals, including rodents and humans, is the product of fate transitions of radial glial cells (RGCs), which function as neural stem cells (NSCs), sequentially generating waves of post-mitotic neurons that migrate superficially from the ventricular germinal zones (VZ) to form the ontogenic columns of the cortical layers (Angevine and Sidman, 1961; Malatesta et al., 2000; Noctor et al., 2001; Rakic, 1974, 1988). This evidence has led to a sustained interest in defining how the commitment and transition from proliferative RGCs to excitatory cortical neuronal fate are controlled.

In the developing mammalian telencephalon, organizer centers secreting morphogenic signals emerge to pattern the cortical field prior to neuron specification (Geschwind and Rakic, 2013; Grove and Fukuchi-Shimogori, 2003; O'Leary et al., 2007; Sur and Rubenstein, 2005). Moreover, the excitatory and inhibitory neurons of the cortex emerge in two different zones, the dorsal and ventral telencephalon (Kwan et al., 2012b; Sandberg et al., 2016; Wonders and Anderson, 2006). In spite of its central importance, many features of this very early period when telencephalic regional identities are first acquired are not well understood, particularly in human. Recent reports of species-specific differences in corticogenesis are often focused on relatively late neurogenic stages when there is an enhanced genesis, in humans, of superficial neurons from the outer sub-ventricular zone (oSVZ) (Namba and Huttner, 2017; Nowakowski et al., 2016; Zhu et al., 2018). However, the evolutionary expansion of the human cerebral primordium is evident from the earliest stages and is already prominent when RGCs produce the first glutamatergic neurons (Bystron et al., 2008; Geschwind and Rakic, 2013). Thus, there is a clear interest in defining how the early patterning mechanisms are coordinated to achieve discrete waves of neurogenesis.

Evidence of genetic risk for neuropsychiatric disorders has been found in the patterns of genes expressed in the neurogenic fetal cortex (de la Torre-Ubieta et al., 2018; Gulsuner et al., 2013; Parikshak et al., 2013; State and Sestan, 2012; Willsey et al., 2013; Xu et al., 2014). Moreover, risk associated genes have been identified in the *in vitro* functional phenotypes of NSCs derived from patient-specific induced pluripotent stem cells (iPSCs) (Brennand et al., 2015; Consortium, 2017; Fujimori et al., 2018; Lang et al., 2018; Madison et al., 2015; Marchetto et al., 2016; Mariani et al., 2015; Schafer et al., 2019). These studies defining the molecular and developmental origins of risk for brain disorders point to the importance of early telencephalic fate transitions in the onset of pathogenic mechanisms.

*In vitro* neural systems are central in modeling these early events in neurogenesis. The growth factors FGF2, insulin and other extracellular ligands, acting through the MAPK/ERK and PI3K/AKT pathways on the expression of cell cycle regulators, control the critical transition when proliferating cortical NSCs initiate neurogenesis, both during brain development and in cell culture (Adepoju et al., 2014; Androutsellis-Theotokis et al., 2006; Cattaneo and McKay, 1990; Johe et al., 1996; Lehtinen et al., 2011; Qi et al., 2017; Rash et al., 2011; Ravin et al., 2008; Vaccarino et al., 1999). Lineage analysis of rodent NSCs differentiating *in vitro* directly demonstrated rapid commitment of multipotent cells to neuronal or glial fates (Ravin et al., 2008). However, we still lack a comprehensive view of the molecular events regulating human NSC progression to post-mitotic cortical glutamatergic excitatory neurons.

Here, we modulated FGF2-MAPK signaling to control the developmental progression of mouse and human NSCs towards neurogenesis *in vitro*. We first strictly define the acute molecular events as NSCs commit to excitatory glutamatergic fates. Then, building on previous work (Edri et al., 2015; Sakaguchi et al., 2015), we show that when human NSCs derived from PSCs were serially passaged *in vitro*, they self-organize to transition through a sequence of dorsal telencephalic developmental stages. At early passages human NSCs expressed genes characteristic of the cortical hem, the dorso-caudal organizer zone of the telencephalon (Caronia-Brown et al.,

2014), progressing later to cortical glutamatergic neuronal fates. We then derived multiple human iPSC lines that showed intrinsic variability in this early organizer state formation and in the consequent differentiation bias to dorsal or ventral telencephalic fates. This work shows that patterning mechanisms and commitment events that generate dorsal or ventral telencephalic neuronal fates are coordinated features that emerge under precise control in human NSCs *in vitro*. This 2-dimensional experimental system opens to further systematic analysis these early non-linear fate transitions that specify human cortical fates.

## RESULTS

### **Waves of transcriptional dynamics during mouse *in vitro* neurogenesis are regulated by FGF2 signaling**

To define the events of cortical neuron commitment we first used primary NSC cultures derived from mouse dorsal telencephalon at the beginning of neurogenesis, embryonic day 11.5 (E11.5). *In vitro*, rodent cortical NSCs proliferate maximally in presence of 10 ng/ml FGF2 and abruptly differentiate when this growth factor is withdrawn (Adepoju et al., 2014; Cattaneo and McKay, 1990; Ravin et al., 2008). Here, we modulated FGF2 signaling to assess the differentiation trajectory of NSCs. NSCs were exposed to a range of FGF2 doses (0.1, 1, or 10 ng/ml) for 48 hours after passage, and their later differentiation was monitored on day *in vitro* 15 (DIV 15) (Figure 1A). Consistent with a known role for FGF2 in antagonizing neurogenesis (Rash et al., 2011), the cultures exposed to lower (0.1 or 1.0 ng/ml) rather than the higher (10 ng/ml) dose of FGF2 generated more glutamatergic excitatory neurons of every subtype, as defined using established cortical layer specific markers (Kwan et al., 2012b; Molyneaux et al., 2007; Shen et al., 2006) (Figure S1A and B), and expressed significantly higher level of the pre- and post-synaptic proteins Synapsin 1 (SYN1) and Homer1 (HOM1) (Figure 1Fi and iii, S1C). Electrophysiological data also show regulation of the neuronal activity induced by early FGF2 treatment (Figure S1D). These results confirm that the FGF2 signaling status of NSCs exiting the cell cycle regulates the produc-

tion and the functionality of glutamatergic neurons many days later. This *in vitro* experimental system will be further used here to explore cellular progression during neurogenesis, from proliferation to the post-mitotic state.

To gain insight into the transcriptional dynamics of NSCs progressing to excitatory neuron fates, mouse cortical NSCs were exposed to varying doses of FGF2 and total RNA was collected for RNA sequencing (RNA-seq), from 6 hours to 12 days of differentiation (Figure 1A). Principal component analysis (PCA), which identifies major axes of variation among the samples, defined progressive differentiation across the time in PC1 (Figure S2A), indicating that NSCs exposed to lower FGF2 concentrations moved more rapidly through this transition in gene expression. To explore these transcriptional dynamics at higher resolution, we employed the genome-wide CoGAPS (GWCoGAPS) non-negative matrix factorization (NMF) method. This method assigns weights for the contribution of every gene to a set number of patterns representing dominant changes in gene expression across all the *in vitro* samples (Fertig et al., 2014; Stein-O'Brien et al., 2017). GWCoGAPS analysis, identifying 11 patterns (p1-11), defined sequential waves of transcriptional extinction and induction as NSCs differentiated. Hierarchical clustering ordered these patterns into three groups associated with: (1) NSC expansion (p5 and p6); (2) initiation of neural differentiation (p1, p11, p7, p9 and p10); and (3) further maturation (p9, p10, p4 and p8) (Figure 1B, S2B and C). The early patterns (p5 and p6) were maintained in high FGF2 dose and enriched in cell cycle regulator genes, defined by gene ontology (GO) analysis. The initial FGF2 condition controlled sequential waves of gene expression in the first 6 days of differentiation (patterns p1, p11, p7 and p9). Importantly, GO analysis defined distinct end points for low and high FGF2 conditions that reflect either terminal neuro- (p8; low FGF2) or glio- (p4; high FGF2) genesis (Figure 1B). Hence, NSCs passaged into low FGF2 down-regulated cell cycle genes and traversed later steps of neuron differentiation more efficiently than in high FGF2 (Figure S3A-D). This high-resolution analysis defines dynamic waves of transcription initiated by variation in FGF2 signaling as NSCs exit the cell cycle, distinguishing differentiation trajectories that from the earliest times were biased towards either cortical neurons or glia.

### **Early endogenous BMP signaling is required for mouse cortical neurogenesis**

To address the events initiating differentiation of dorsal telencephalic neurons, we focused on BMP signaling that is known to oppose FGFs both in patterning the telencephalon *in vivo* and regulating NSC differentiation *in vitro* (Lehtinen et al., 2011; Lillien and Raphael, 2000; Mabie et al., 1999; Tiberi et al., 2012). When hierarchical clustering was used to analyze the dynamics of BMP signaling during *in vitro* neurogenesis, distinct waves of expression of BMP responsive genes correlated with particular BMP ligands were initiated by the early exposure to FGF2 (Figure 1B pattern p7 and C-E, S4A and B). Nuclear phosphorylated SMAD1/5 (pSMAD1/5) signal monitored a rapid transient induction of endogenous BMP in low FGF2 doses (Figure S4C), that paralleled the induction of mRNA expression for BMP4 and the BMP induced antagonist Noggin (Figure 1D and S4B).

To determine if this early BMP signaling had a significant effect on neurogenesis and neuronal maturation, we perturbed it 12 hours after plating NSCs, prior to BMP4 transcription (Figure 1A and S4B). The early inhibition of BMP signaling by the BMP type I receptor (BMPRI) inhibitor LDN193189, applied to NSCs exposed to low FGF2 dose, blocked both pSMAD1/5 induction at DIV 2 and the subsequent neurogenesis and synaptic maturation seen at DIV 15. Exposing NSCs to high FGF2 dose plus exogenous BMP4 boosted pSMAD1/5 levels but did not rescue the compromised synaptogenesis, suggesting that a specific BMP responsive cell state must be induced prior to the neuronal differentiation program (Figure 1F, S4D and E). We previously demonstrated that rodent telencephalic NSCs consist of a heterogeneous and dynamic population with rapidly varying lineage potential (Ravin et al., 2008). These data indicate that low FGF2 induces response to an endogenous and transient wave of BMP signaling that is required for cortical excitatory neuron commitment *in vitro*.

### **Mouse cortical NSC subtypes show selective FGF2-induced BMP signaling activation and distinct fate bias**

To further explore NSC diversity during cortical neurogenesis, we interrogated the surface expression of the tyrosine kinase receptors PDGFR $\alpha$  and EGFR which identify subsets of embryonic dorsal telencephalic NSCs generating neurons and glia *in vivo* and *in vitro* (Andrae et al., 2001; Lillien and Raphael, 2000; Park et al., 1999; Sun et al., 2005). Remarkably, the proportion of PDGFR $\alpha$ <sub>high</sub> and EGFR<sub>high</sub> cells was regulated by FGF2 dose in the first 2 days *in vitro*, and moreover, the expression of the receptors was mutually exclusive before decreasing at DIV 6 (Figure 2A and S5A). These data indicate that transient waves of EGFR and PDGFR positive cell states occurred during the differentiation progression of NSCs *in vitro*.

Time-lapse recording and lineage analysis showed that FGF2 signaling controlled the cell cycle duration of EGFR<sub>high</sub> cells in a dose dependent manner (Figure S5B), inducing also higher levels of phosphorylated FGF receptor (pFGFR) and pERK across all the doses (Figure S5C). However, no differences in FGFR2, FGFR1 and FGFR3 expression were seen between PDGFR $\alpha$ <sub>high</sub> and EGFR<sub>high</sub> cells (Figure S5C and not shown). These data suggest that FGF2 induced asymmetric signaling in the two subtypes. Higher expression of the neural fate transcriptional regulators HES1 and PAX6 was seen in EGFR<sub>high</sub> cells, while the levels of the precursor marker SOX2 were higher in PDGFR $\alpha$ <sub>high</sub> cells (Figure S5D). Extending the above data showing early induction of endogenous BMP signaling was required for cortical neurons to efficiently differentiate, higher BMPR1A expression and pSMAD1/5 signal was found in EGFR<sub>high</sub> cells in low FGF2 (Figure 2B). These results indicate that BMP signaling was initiated in a transient EGFR<sub>high</sub> NSC state.

The fate bias of these NSC subtypes was assessed by time-lapse recording to create lineage dendrograms linking EGFR<sub>high</sub> or PDGFR $\alpha$ <sub>high</sub> founder cells at DIV 1 to the derived neurons, oligodendrocytes and astrocytes, identified at DIV 6 by expression of TuJ1, O4 or GFAP (Figure S6Ai; Video S1-3). PDGFR $\alpha$ <sub>high</sub> progenitors committed with similar proportions to oligodendrocytes or neurons in low FGF2, and predominantly to oligodendrocytes at the higher FGF2 dose. EGFR<sub>high</sub> cells were tripotent, both in 1 and 10 ng/ml FGF2 (Figure 2C). Consistent with the tran-



scriptomic data (Figure 1 and S3), the lineage analysis showed that faster cell cycle exit correlated with early neuron specification of the EGFR<sub>high</sub> cells (Figure 2C and S6Aii). These results suggest that efficient neurogenesis was associated with an early wave of differentiating EGFR<sub>high</sub> cells becoming acutely post-mitotic in low FGF2 conditions.

To lineage trace neurons at more mature stages of differentiation (DIV 15), we employed adeno-associated viruses (AAV) encoding green fluorescent protein (GFP) with preferential tropism for cells expressing either PDGFR $\alpha$  (AAV5) or EGFR (AAV6) (Di Pasquale et al., 2003; Jackson et al., 2006; Weller et al., 2010) (Figure S6B and C). AAV6-infected cells preferentially generated CUX1<sup>+</sup>, FOXP2<sup>+</sup>, or TLE4<sup>+</sup> glutamatergic neurons, while AAV5-infected cells more GAD65 expressing putative GABAergic neurons with less complex morphologies (Figure 2D and S6D). These results define an EGFR<sub>high</sub> BMP responsive cell state that efficiently produces cortical glutamatergic neuronal fates.

### **Cortical neuron differentiation bias varies with the passage of human NSCs**

Having defined the events of the transition to glutamatergic neurons from mouse cortical NSCs, we investigated neuronal commitment mechanisms in human dorsal telencephalic NSCs derived from PSCs *in vitro* (Edri et al., 2015; Mariani et al., 2012; Shi et al., 2012). Using standard neural induction protocols (Chambers et al., 2009; Edri et al., 2015), telencephalic NSCs were generated from the widely used human embryonic stem cell (ESC) line H9 that were then serially passaged in high FGF2 (Figure 3A). From passage (PS) 2 to 5, human NSCs were analyzed for the expression of fate regulators SOX2, HES1, HES5, OTX2, PAX6 and SOX21 (Figure S7A and B). The spontaneous emergence of the neural rosette-forming state at PS3 and PS4 and its subsequent decline provided a system to define the dynamics of neurogenic fate mechanisms in human.

The neurogenic potential of the hNSCs was explored using FGF2 signaling modulation, as with the mouse system. Following serial expansion in high FGF2 from PS2 to 8, hNSCs from each passage were exposed to varying concentrations of FGF2 for 6 days before RNA collection for

RNA-seq (Figure 3A). PC1 revealed transcriptional progression across passages that was independent of FGF2 dose (Figure S7Ci). Gene expression data can be visualized or “projected” into a low-dimensional space defined by another data set, allowing exploration of the transcriptional modules defined in one data set as they change in the other. To relate the dynamics of hNSCs *in vitro* to *in vivo* cortical development, we projected gene expression data from the developing human (Jaffe et al., 2018) or macaque neocortex (Bakken et al., 2016) into the transcriptional space defined by the individual gene weights from PC1, using projectR (Figure S7Cii and iii) (Stein-O'Brien et al., 2019); see Experimental Procedures). The projection analysis indicated the transcriptional dynamics identified by PC1 *in vitro* parallel human and macaque development as neurogenesis peaks *in vivo*.

To characterize these transcriptional dynamics at a more granular level, we explored a set of 24 patterns (p1-24) defined by the GWCoGAPS algorithm in this *in vitro* hNSC RNA-seq data (Figure S8A). Three of these patterns (p5, p6, p22) showed transcriptional differences across FGF2 dose that peaked at PS4, when neural rosettes were most abundant (Figure 3Bi and S8A). Projection of the developing macaque cortex gene expression data (Bakken et al., 2016) into these patterns shows that p5 specifically identifies a gene signature more highly expressed in the forming cortical plate (CP) than in the germinal SVZ and VZ domains throughout this neurogenic period (Figure 3Bii and S8B).

To more precisely relate these *in vitro* transcriptional dynamics to discrete cell types of the developing primate neocortex, we generated a single-cell mRNA sequencing (scRNA-seq) data set from 2 macaque fetal visual cortex (V1) samples collected at E77 and E78, using 10x Genomic platform. Data from 17161 single cells passed quality control measures and were included in the present study. Using unsupervised clustering, we identified major cell clusters including RGCs, intermediate neuronal precursor cells (IPCs), excitatory neurons (ExNe), interneurons (InNe) (Figure S9A and B). Projection of this monkey fetal V1 or human developing cortex scRNA-seq data (Nowakowski et al., 2017) into the hNSC GWCoGAPS patterns confirmed that p5 correlates with

post-mitotic IPC and excitatory neuron signatures *in vivo* (Figure 3Biii and S9Ci-iv). Pattern p22 induced by high FGF2 was not associated with an excitatory neurogenic signature in either projection (Figure 3B and S8B). These results indicate that the *in vitro* appearance of new-born cortical neurons was favored specifically at PS4 by acute reduction of FGF2 and, importantly, that gene expression dynamics occurring during *in vitro* neurogenesis parallel those in the neurogenic primate neocortex.

Immuno-fluorescence was used to further explore the differentiation of PS4 hNSCs into post-mitotic neurons. The data show that low FGF2 favored a switch from proliferating (EDU<sup>+</sup>), SOX2<sup>+</sup> hNSCs to SOX2<sup>-</sup>, PAX6<sup>-</sup>, TuJ1<sup>+</sup>, EGFR<sub>high</sub>, DCX<sup>+</sup> post-mitotic (EDU<sup>-</sup>) new-born neurons (Figure 3C, S8Ciii-v and D). Elevated pSMAD1/5 immunoreactivity showed that this transition from dividing precursors to young neuroblasts induced by low FGF2 was associated with a burst of endogenous BMP signaling occurring most efficiently at passage PS4 (Figure 3C and S8Cvi). These results suggest that post-mitotic neurons with cortical glutamatergic features were specified by a conserved mechanism in human and mouse NSCs and, importantly, that hNSCs differ with passage in the generation of pertinent intermediates as excitatory cortical neuronal fates were specified (Figure S8Ci-iv).

### **EGFR-BMP signaling interaction defines a neurogenic transition state in RGCs of the developing primate cortex**

Next, we investigated whether the progression of the NSC states seen *in vitro* recapitulates fundamental events of RGC development *in vivo*. In primates, the expression of PAX6 defines the neurogenic potential of RGCs in the VZ and marks committed neurons in the oSVZ (Hansen et al., 2010; Mo and Zecevic, 2008). In the E70 macaque dorsal parietal cortex we detected EGFR and PAX6 co-expression in RGCs of the VZ/iSVZ and in committed neurons delaminating through the oSVZ (Figure 3Di and ii, S9Di). The induction of nuclear pSMAD1/5 detected in EGFR<sub>high</sub> expressing RGCs indicates BMP signaling response, suggesting transition of these cells to neurogenic precursors (Lehtinen et al., 2011; Li et al., 1998; Saxena et al., 2018) (Figure

3Dii and iii). Moreover, we found EGFR<sub>high</sub> precursors expressing the neurogenic transcription factor EOMES/TBR2 in iSVZ, confirming neuronal commitment of these cells (Figure S9Dii and iii) (Arnold et al., 2008; Englund et al., 2005; Pollen et al., 2015). Interestingly, EGFR staining was not detected in CP cells expressing later neuronal markers such as TBR1 (Figure S9Di, ii and iv).

We explored this transition further in the monkey fetal V1 scRNA-seq data and identified a population of early neuronal IPCs progressing from RGCs, expressing EGFR, TBR2, SOX2, NEUROG1 (Figure 3E and S9B). These results are consistent with the hypothesis that hNSCs *in vitro* model a mid-neurogenic phase of primate cortex development, when an EGFR<sub>high</sub> expressing RGC population employs BMP signaling in a transition state from proliferative cells to committed glutamergic cortical neurons.

### **Early passage human NSCs show cortical organizer identities**

To understand the origins of the neurogenic peak, we focused on NSC states prior to PS4. Five GWCoGAPS patterns from the *in vitro* hNSC data showed the highest gene expression at PS2 and PS3 (p8, p11, p2, p4, p19) (Figure 4Ai and S10Ai). Of these, pattern p2, 11, 4 and 19 but not p8 were dependent on the initial FGF2 status of the cells. These transcriptional dynamics suggest these early stages of hNSCs also undergo an FGF2 regulated developmental progression that we explore further here.

Projection of the developing macaque cortex gene expression data (Bakken et al., 2016) into these early passage hNSC GWCoGAPS patterns showed that p8 and the low FGF2 patterns p11 and p2 expressed genes characteristic of the cortical hem domain (Figure 4Aii and S10B). Importantly, neither the early high FGF2 patterns p4 and p19, nor the later patterns p5 and p22 (described above), showed enrichment of genes of the cortical hem domain (Figure S10Aii and 3Bii). This analysis indicates that low FGF2 conditions at early passages induced elements of the hem transcriptional signature. The cortical hem is a source of BMP and WNT morphogens that pattern

the dorso-caudal domain of the telencephalon (Caronia-Brown et al., 2014; Grove et al., 1998). In order to monitor the emergence of this cellular organizer identity across the hNSC passages, we used the gene expression data from the developing macaque cortex (Bakken et al., 2016) to generate a list of hem-specific genes of the primate telencephalon (Figure 4B; see Experimental Procedures). Passages 2 and 3 were enriched in these genes including LMX1A, WNT8B, WNT3A, BMP2/4/6/7, RSPO1/2/3 and BAMBI indicating coordinated transient expression of the cortical hem transcriptional signature, sensitive to FGF2 dose, at early passages of *in vitro* hNSCs (Figure 4B). The expression patterns of genes such as FGF8, TTR and SFRP2 at these early passages suggest that other organizer states including rostral patterning center (RPC), choroid plexus and antihem were also represented (Assimacopoulos et al., 2003; Sakaguchi et al., 2015; Storm et al., 2006) (Figure S10C).

Consistent with the known function of LMX1A in the specification of neural organizers including the cortical hem in the mouse (Chizhikov et al., 2010), the expression of this transcription factor was highest at PS2 in low FGF2 and subsequently decreased (Figure 4Ci and iv). In contrast, FOXG1 and LHX2, which are required in the mouse to form the medial pallium and lateral cortex and to repress the formation of the cortical hem (Bulchand et al., 2001; Hanashima et al., 2007; Mangale et al., 2008; Molyneaux et al., 2007; Monuki et al., 2001), were expressed more prominently at later passages (Figure 4Ci, ii, iv and v). At PS3, the majority of cells expressed LMX1A or LHX2, suggesting co-emergence of the caudal hem organizer and precursor cells of the cortical field which then become dominant in PS4 (Figure 4Civ). The progressive appearance of cells co-expressing OTX2, a transcriptional regulator of the choroid plexus and cortical hem (Sakaguchi et al., 2015), and FOXG1 at PS3, followed by OTX2<sup>-</sup> FOXG1<sup>-</sup> EGFR<sub>high</sub> cells at PS4 (Figure 4Cii, iii and v), is consistent with the progression of hNSCs from a hem to cortical neurogenic identity (Figure 4C and D). This coordinated change indicates that cortical patterning and dorsal excitatory neuronal specification mechanisms are efficiently executed across early passages of human neural precursors generated *in vitro*.

### **Human NSC line variation in organizer states results in divergent neuronal fate trajectories**

To address the stability of these early telencephalic differentiation steps we analyzed multiple human iPSC lines. 6 hiPSC lines [2063-1, -2; 2053-2, -6; 2075-1, -3] were generated from scalp fibroblasts of 3 donors and differentiated towards forebrain fates. Aiming to probe intrinsic developmental bias in early steps of telencephalic commitment in different human iPSC lines, we employed a 32-day differentiation protocol including the DKK1 mimetic XAV939 (X), which inhibits BMP and WNT signaling promoting anterior fates (Glinka et al., 1998). To limit FGF2 mediated effects on regional identity of the NSCs and neurogenesis (Hendrickx et al., 2009; Korada et al., 2002; Raballo et al., 2000; Rash et al., 2013), the neuronal differentiating conditions X + LSB (XLSB) were applied directly to the iPSCs, without intervening passages of the NSCs in presence of FGF2 (Figure 5A).

To analyze the differentiation states induced by this treatment, RNA was collected at different time points for sequencing analysis. PC1 of the gene expression data showed that all the samples progressed with similar kinetics through a common landscape of differentiation, promoted with similar efficiency in all 6 lines by growing NSCs either with or without rat astrocytes, known to facilitate neuronal maturation (Figure 5Bi). NSC fate regulators (SOX21, OTX2 and HES3) had high expression at early time points, in contrast to regulators of neuronal function (NEFL, SYP, SYT4, and SNAP25) expressed at later times (Figure S11A). Projection of gene expression data from micro-dissected regions of fetal human cortex (Miller et al., 2014) into PC1 demonstrated that the *in vivo* spatio-temporal progression that generates post-mitotic neurons of the CP maps onto the time course delineated in this PC1 (Figure 5Bi).

In contrast to PC1 where all 6 iPSC lines progressed equivalently, PC3 identified distinct patterns of gene expression on days 17 and 30 in two groups of cell lines: [2063-1, -2 and 2053-2] and [2053-6 and 2075-1, -3] (Figure 5Bii). Projection of the fetal human cortex gene expression data (Miller et al., 2014) into PC3 distinguished cell lines with differential expression of dorsal pallium [2053-6 and 2075-1, -3] or ventral ganglionic eminence genes [2063-1, -2 and 2053-2] (Figure

5Bii). Dorsal telencephalic regulators such as PAX6, FEZF2, NEUROD4 and NEUROG2 were highly expressed in one group of cells (2053-6, 2075-1 and -3), while regulators of ventral telencephalic fates such as NKX2-1, FOXP1, LHX6/8, SHH and DLX genes (Sandberg et al., 2016) were highly expressed in the other (2063-1,-2 and 2053-2) (Figure S11B). This analysis suggests that by day 17, these two groups of hiPSC lines have accessed dorsal or ventral telencephalic fates with different efficiencies.

To gain a higher resolution view of transcriptional change in this system we decomposed the 6 hiPSC lines RNA-seq data with the informatic tool GWCoGAPS, identifying a set of 30 gene expression patterns (GWCoGAPS-III p1-p30) (Figure S12). Among these, patterns of genes restricted to the two groups of cell lines were identified. GWCoGAPS-III pattern p3, p14 and p15 showed differential expression in the two groups of cell lines at days 17 and 30 (Figure 5C and S12), again involving dorsal versus ventral telencephalic genes as indicated by projection of macaque developing cortex gene expression data set (Bakken et al., 2016) into GWCoGAPS-III using projectR (Figure 5Ci and ii). The GWCoGAPS-III p3 revealed enhanced expression of genes promoting dorsal telencephalic fates, including FEZF2 and PAX6 ( $p=5.0e-11$  and  $p=9.0e-13$  in DESeq2 on day 17). In contrast, the top weighted genes in the GWCoGAPS-III p15 included regulators of inhibitory neuron differentiation and function (ASCL1\*, NKX2-1\*, LHX6, LHX8, GAD1, DLX1\*, DLX2\*, DLX5\*, DLX6\*; \*,  $p=1.0e-5$  in DESeq2 analysis of differential expression on day 30) (Figure S11C).

These data raise the question whether the differential bias toward dorsal or ventral telencephalon shown by these hiPSC lines emerge from an earlier fate segregation process. GWCoGAPS-III p2 and p16 distinguished the two groups of cell lines already at day 8 (Figure 5Di). Interestingly, the projection of macaque developing cortex gene expression data (Bakken et al., 2016) into the GWCoGAPS-III patterns indicates that cortical hem genes, including OTX2, WNT8B, RSPO2, and WLS were highly weighted in p2 more than in p16 (Figure 5Di and S11D). These dynamics were confirmed by the high expression of LMX1A at day 8 followed by induction of EGFR at later

time points in the lines with dorsal bias, consistent with the appearance of cortical excitatory neuronal precursors following patterning states (Figure 5Dii). These data indicate that the three lines that most efficiently generate cortical excitatory neurons were biased towards dorso-caudal organizer fates at earlier steps. The generality of the emergence of early organizer states *in vitro* was confirmed in public sequencing data of differentiating cortical neurons derived from hiPSCs (Edri et al., 2015; van de Leemput et al., 2014) by projection into the hem-associated GWCoGAPS-III p2 (Figure S11E). Importantly, NKX2.1 and SHH, well known ventral fate regulators (Sandberg et al., 2016), were maximally expressed in the cell lines with ventral bias on days 17 and 30 (Figure 5Dii and S11F). Prior to this, on day 8, FGF8 known to pattern the antero-ventral telencephalon (Storm et al., 2006) was maximally expressed in the cell lines with ventral bias (Figure 5Dii). These data indicate that the divergent neuronal trajectory bias of hNSCs was coordinated with early mechanisms regulating the emergence of distinct organizer signals in the generation of forebrain NSCs from pluripotent states (Figure 6). The molecular and cellular basis for this variation may be readily probed further across many human pluripotent lines, progressing *in vitro* as we describe here.

## DISCUSSION

In the present study, we first defined the transcriptional progression of mouse and human cortical NSCs transitioning to glutamatergic excitatory neuronal fates *in vitro*. Our understanding of the cellular dynamics across dorsal telencephalic neuronal commitment was extended by the analysis of mouse NSC populations transiently expressing distinct levels of EGFR or PDGFR. We show that FGF2 signaling generates asymmetry within NSC progenitors instructing a wave of EGFR<sub>high</sub> cells that take on cortical excitatory neuronal fates. Mouse and human EGFR<sub>high</sub> NSCs in low doses of FGF2 initiated an endogenous BMP signaling cascade as cortical glutamatergic neurons first differentiated. In higher FGF2 concentrations we observed compromised neurogenesis that we attribute to a delayed BMP activity and differentiation of EGFR<sub>high</sub> cells, preferentially generating glia fates in these conditions. The different neuronal trajectories traversed by *in vitro* NSCs exposed to varying FGF2 doses are consistent with previous *in vivo* results indicating that



FGF2 signaling perturbation, during mouse embryogenesis, affects neurogenesis in the dorsal telencephalon specifically (Korada et al., 2002; Raballo et al., 2000; Rash et al., 2011; Rash et al., 2013). It has been shown in mouse that PDGFR $\alpha$  marks dorsal telencephalic NSCs that differentiate into neurons *in vivo* (Andrae et al., 2001) and *in vitro* after exposure to PDGF ligands (Johe et al., 1996; Park et al., 1999). We showed that PDGFR $\alpha_{\text{high}}$  NSCs do not respond to FGF2-induced BMP and generate GABAergic inhibitory more efficiently than cortical excitatory neurons in our *in vitro* system. A subpallial origin of these NSCs seems unlikely, as fluorescence activated cell sorting data in our lab, not shown in this work, indicate that the discrete PDGFR $\alpha_{\text{high}}$  and EGFR $\text{high}$  subtypes become one population double positive for both receptors in suspension, suggesting these are two states of the same precursor that probably reset potency with passage, as previously reported for NSCs (Ravin et al., 2008). It will be interesting to determine if these embryonic NSCs share features with other previously identified adult mouse telencephalic precursors expressing PDGFR $\alpha$ , including a subset of B type NSCs in the SVZ generating olfactory bulb interneurons and oligodendrocytes (Jackson et al., 2006), or others defining the oligodendrocyte lineage (Marques et al., 2016). Extending previous work identifying EGFR expressing cells as astro-glial precursors of the late SVZ in rodents and monkey (Burrows et al., 1997; Lillien and Raphael, 2000; Rash et al., 2019; Sun et al., 2005), our work defines a transient population of neurogenic EGFR $\text{high}$  RGCs responsive to BMP signaling undergoing acute neuronal commitment during cortical development *in vitro*.

From the first generation of neurons from mouse pluripotent sources *in vitro* (Kim et al., 2002; Okabe et al., 1996) to the many recent studies of the transcriptomic and epigenetic landscapes of the developing human cerebral cortex (de la Torre-Ubieta et al., 2018; Nowakowski et al., 2017; Zhu et al., 2018), it has been shown that neuronal differentiation from NSCs requires transitions through a series of cellular intermediates. Here, after defining the acute transition events leading to post-mitotic excitatory neuron fates, we explored *in vitro* the intrinsic patterning mechanisms that coordinate corticogenesis prior to the ingrowth of thalamic afferents *in vivo* (Armentano et al., 2007; Bishop et al., 2000; Cholfin and Rubenstein, 2007; Fukuchi-Shimogori and Grove, 2001;

Miyashita-Lin et al., 1999; Nakagawa et al., 1999; Shimogori and Grove, 2005). We demonstrate the sequential appearance of organizer and cortical neuron precursor domains *in vitro*. Previous work has demonstrated the presence of organizer structures in cerebral organoids derived from human iPSCs (Renner et al., 2017). We show that the earliest events in human telencephalic patterning and neurogenesis may be systematically analyzed with PSCs using this 2D *in vitro* system, which give different advantages compared to 3D cultures (Pasca, 2018), and where we can observe the emergence of competing cortical patterning signals that determine regional neuronal fates.

The variation in the organizer states and subsequent divergent telencephalic trajectories revealed in the newly-generated iPSC lines validates this concept, providing an opportunity to define how morphogenetic spatial patterning is co-ordinated with the specification of excitatory or inhibitory neurons in the human telencephalon. Consistent with these data, another recent study shows variation in dorso-ventral telencephalic fate bias across cerebral organoids derived from multiple donor iPSCs (Kanton et al., 2019). Interestingly, we also observed that replicate lines from same individual (2053-2, -6) can traverse divergent telencephalic regional fates under same differentiation conditions. Previous reports have shown that transcriptional heterogeneity or differentiation capacity variability of multiple donor iPSC lines are under both genetic and epigenetic control (Carcamo-Orive et al., 2017; Nishizawa et al., 2016). Future studies will link genetic and epigenetic mechanisms to the divergent transcriptional phenotypes and fate bias we observed here.

The developmental mechanisms controlling these early telencephalic fates are of great interest as they are proximal to genetic risk for many neurodevelopmental disorders, including autism spectrum disorder (ASD) (Consortium, 2017; Kwan et al., 2012a; Madison et al., 2015; Marchetto et al., 2016; Mariani et al., 2015; Schafer et al., 2019), and brain cancers (Crawley et al., 2016; Ernst, 2016). Progress continues in defining disease relevant *in vitro* phenotypes using genetically distinct hPSC lines as a central tool in the development of novel therapeutic interventions (Fujimori et al., 2018; Hubler et al., 2018; Lang et al., 2018). Our study suggests that to

achieve accurate models of risk for neuro-psychiatric disease, it will be necessary to more powerfully assess the extent and the origin of the developmental variation in patient-specific iPSCs, as they progress through the non-linear transitions described here. Defining, as we described, cell state transitions and subsequent distinct neuronal differentiation trajectories will be central in selecting optimal lines for specific fates and designing cell assays that more efficiently reveal phenotypes of interest, across a more precisely controlled neurogenic landscape *in vitro*. When integrated with the unprecedented transcriptomic and epigenetic mapping of the human forebrain (Amiri et al., 2018; de la Torre-Ubieta et al., 2018; Li et al., 2018; Wang et al., 2018; Zhu et al., 2018), the neural cell state transitions defined in this study will yield new functional insight into the origin of developmental risk for neuro-psychiatric disorders.

#### **AUTHOR CONTRIBUTIONS**

N.M. and R.D.M. conceived the study. N.M. performed experiments and data collection. N.M. and SK.K. performed stem cell culture. M.D.B. performed e-physiology. Y.W. generated hiPSC lines. JH.S. generated bulk RNA-seq data. G.SO., E.J.F., JH.S., C.C. processed and analyzed bulk RNA-seq data. N.M. and J.A. collected monkey V1 single cells. S.M. and C.C. analyzed scRNA-seq data. N.M., SK.K., S.S., D.J.H. performed IF, imaging and high-content image analysis. N.M., C.C., G.SO, D.J.H. performed lineage analysis. N.M. and K.R.M. performed neuro-morphology analysis. B.G.R. performed IHC and imaging of the monkey tissue slides. J.A. banked monkey tissue. N.M., SK.K., G.SO., S.S., Y.W., N.A.O., J.G.C., C.C., D.J.H. developed biological and bioinformatic pipelines to manipulate and analyze hPSCs. N.M., SK.K., G.S.O., D.J.H., C.C., N.S., P.R., R.D.M. interpreted the data. A.J.C., R.B., N.J.B., D.R.W., N.S., P.R. and R.D.M. directed the research. N.M., SK.K., C.C., R.D.M. wrote the manuscript. All authors participated in discussion of results and manuscript editing.

#### **ACKNOWLEDGEMENTS**

This work was supported by the Lieber Institute for Brain Development (LIBD) and the NIH grants DA02399 and EY002593 to P.R. and MH106934, MH106874, MH116488, MH110926 and

MH109904 to N.S., E.J.F. and G.S.O. were supported by the NIH (CA177669, CA212007, CA006973), the Johns Hopkins University Discovery Award, and the Johns Hopkins School of Medicine Synergy Award. We thank many members of LIBD and Yale Department of Neuroscience (Rakic and Sestan labs) for their helpful comments on this work and manuscript. We thank Dr. Alvaro Duque (Rakic Lab) and MacBrainResource (<https://medicine.yale.edu/neuroscience/macbrain/>) for providing NHP tissue (NIMH R01-MH113257 to A.D.).

## DECLARATION OF INTERESTS

The authors declare no competing interests.

## FIGURE LEGENDS

### Figure 1. Transcriptional dynamics and BMP signaling across mouse *in vitro* neurogenesis

(A) Experimental design. Passage 1 (PS1) NSCs were passaged into N2 + different FGF2 doses (PS2). Differentiation was induced by FGF2 withdrawal at DIV2. Neurotrophins (NTs) were added from DIV4. (B) 6 of 11 GWCoGAPS patterns shown in Figure S2. p-values indicate enrichment of GO categories in each pattern. (C-E) (Top) Expression dynamics of selected gene clusters annotated by “BMP receptor signaling” from NCI (full dendrogram in Figure S4), correlating with (C) BMP7, (D) BMP4 and (E) BMP6. BMP7 related genes were rapidly repressed in low FGF2. BMP4 related gene levels increased at the initiation of differentiation. BMP6 related genes were expressed at late time points. (Bottom) Gene weights in each GWCoGAPS pattern for the same upper genes. (F) Immuno-fluorescence images of SYN1 puncta in neurons cultured over astrocytes (i) at different FGF2 doses, or (ii) at 1 ng/ml FGF2 + LDN (100 nM). (iii) SYN1 and HOM1 puncta counts per 100  $\mu$ m of neurite length for each condition, assessed by high-throughput image analysis. Mean  $\pm$  St. Dev., t-test  $n > 5$  fields per measurement. LDN or BMP4 were added 12 hours after NSC plating, and withdrawn with FGF2 at DIV2 (see A).

### Figure 2. Mouse cortical NSC subtypes show selective BMP signaling activation and distinct fate bias

(A) Density plot of PDGFR $\alpha$  and EGFR expression in individually segmented cells

from high-throughput image analysis (images in Figure S5A). Color key: percentile cell counts per bin. **(B)** (Top) Immuno-fluorescence images of pSMAD1/5 in EGFR<sub>high</sub> and PDGFR $\alpha$ <sub>high</sub> cells. Arrow shows pSMAD1/5 signals. (Bottom) Mean signal intensity of BMPR1A or pSMAD1/5 in EGFR<sub>high</sub> and PDGFR $\alpha$ <sub>high</sub> cells at DIV 2 from high-throughput image analysis,  $\pm$  St. Dev. t-test. **(C)** Lineage analysis (see Video S1-3). Commitment events plot across cell generations from PDGFR $\alpha$ <sub>high</sub> (top) or EGFR<sub>high</sub> founder cells (bottom). An event is given by an initial progenitor generating offspring with same fate (see Experimental Procedures). Ol, oligodendrocytes; As, astrocytes; Ne, neurons; D, death (apoptosis).  $n$ = total commitment events. **(D)** Fluorescence intensity of each marker in individual AAV5-GFP- or AAV6-GFP- TuJ1<sup>+</sup> neurons (Ne) at DIV 15. Mean values (lines). t-test.

### **Figure 3. Cortical excitatory neuron fate bias at a specific passage of human NSCs**

**(A)** Scheme of H9 hESC differentiation into NSCs. N2 + LSB (LDN193189 + SB431542) was applied at passage 1, then hNSCs were serially passaged in N2 + 20 ng/ml FGF2. FGF2 modulation was applied at a specific passage for 6 days before RNA collection. **(B)** (i) GWCoGAPS patterns p5 and p22. FGF2 doses indicated. 0 refers to PS1; 20r are replicates for 20 ng/ml FGF2 (ii) Projections of macaque cortex microarray data from (Bakken et al., 2016). CP: cortical plate; Hem: cortical hem; SVZ: subventricular zone; VZ: ventricular zone. (iii) Projection of macaque V1 scRNA-seq data **(C)** (i) Immuno-fluorescence images of EGFR and TuJ1, or pSMAD1/5 expression. (ii) Mean fluorescence intensity of EGFR or SOX2 from high-throughput image analysis. Proportion of EDU<sup>+</sup> or pSMAD1/5<sup>+</sup> cells over total cells at DIV 6, for different FGF2 doses. Mean values  $\pm$  St. Dev. **(D)** Immuno-histochemistry images of E70 macaque cortex sections for EGFR (red; all panels) with PAX6 (i), pSMAD1/5 (ii, arrows indicate some positive cells; iii, higher magnification). Nuclei stained with DAPI. oSVZ/iSVZ: outer/inner subventricular zone; VZ: ventricular zone; LV: lateral ventricle **(E)** t-SNE plots colored by annotated cells and indicated markers of macaque V1 scRNA-seq data. All major clusters are in Figure S9. EGFR<sup>+</sup>, TBR2<sup>+</sup> and NEUROG1<sup>+</sup> IPCs transitioning from RGCs are evident in the insets.

**Figure 4. Cortical organizer identities of early human NSCs before progressing to neuronal**

**fates (A)** (i) GWCoGAPS patterns p8, p11 and p2. FGF2 doses indicated. 0 refers to PS1; 20r are replicates for 20 ng/ml FGF2 (ii) Projections of macaque cortex data from (Bakken et al., 2016). **(B)** Expression of hem related genes. Gene list derived from panel (Aii) contrasting hem with other cortical regions from (Bakken et al., 2016). BMP2, 4 and 7, not derived from the gene list of Aii, are in separate heatmap at bottom. **(C)** Immuno-fluorescence images of (i) LMX1A and LHX2, (ii) FOXP1, (iii) EGFR and OTX2, in cells cultured with 0.1 ng/ml FGF2 for 6 days from passage 2 to 4. FOXP1 (ii) and EGFR/OTX2 (iii) are from same field. (iv-v) From high-throughput image analysis: (iv) proportion of LMX1A and LHX2; (v) scatter plot of EGFR vs OTX2 expressing cells, colored by FOXP1 level. **(D)** Model of the hNSC state progression *in vitro*. (Left) View of a coronal section of the developing mammalian telencephalon. CP: cortical plate; SVZ: subventricular zone; VZ: ventricular zone; MP: medial pallium; GE: ganglionic eminence; LV: lateral ventricle. DM/DL: dorso-medial/-lateral. (Right) Distinct states of *in vitro* hNSCs indicated by markers. State transition of hNSCs induced by low FGF2 showing lineage progression from hem state at passage 2 to cortical neurogenic identity at passage 4. The transition from NSCs to early post-mitotic neurons is defined by EGFR<sub>high</sub> cells responsive to BMP signaling.

**Figure 5. Human NSC line variation in organizer states results in divergent neuronal fate**

**trajectories (A)** (Left) 6 hiPSC lines from 3 donors. Colors indicate divergent neuronal trajectory bias (see below). (Right) Experimental design. hiPSC lines were passaged in mTesR + Rock inhibitor then differentiated into NSCs in N2-B27 + XLSB medium for 12 days (Maroof et al., 2013). Sample collection and passages indicated. On day 17, NSCs were passaged and terminally differentiated with or without astrocytes. RNA was collected on day 30 (NSCs - Astro) or 32 (NSCs + Astro). **(B)** Distinct forebrain trajectories within 6 lines. (Left) Progression of neural differentiation represented by PC1 (i) and emergence of divergent trajectories represented by PC3 (ii). (Right) Projection of human cortex data (Miller et al., 2014). CP: cortical plate; oSVZ/iSVZ: outer/inner subventricular zone; VZ: ventricular zone. **(C)** (Left) Dorsal or ventral trajectories revealed by GWCoGAPS-III p3 (i) and p15 (ii). (Right) Projection of macaque cortex data (Bakken

et al., 2016). **(D)** Hem genes are highly expressed in lines with dorsal lineage bias. (i) (Left) Divergent bias of lines at day 8 revealed by GWCoGAPS-III p2 and p16. (Right) Projection of macaque cortex data. (ii) Expression of the indicated genes across neural differentiation of the 6 hiPSC lines.

**Figure 6. Divergent trajectory bias of human NSCs generated from pluripotent states.**

Variation in the emergence of organizer states during the generation of forebrain NSCs from donor specific hiPSCs, shown by different colors of the plates. The *in vivo* model illustrates developmental axes and signaling centers of the telencephalon. *In vitro*, early hNSCs show bias in their regional patterning state and progress from rostro-ventral or dorso-caudal identity towards inhibitory or excitatory neurogenesis. DM/DL: dorso-medial/-lateral.

## REFERENCES

Adepoju, A., Micali, N., Ogawa, K., Hoepfner, D.J., and McKay, R.D. (2014). FGF2 and insulin signaling converge to regulate cyclin D expression in multipotent neural stem cells. *Stem Cells* 32, 770-778.

Amiri, A., Coppola, G., Scuderi, S., Wu, F., Roychowdhury, T., Liu, F., Pochareddy, S., Shin, Y., Safi, A., Song, L., *et al.* (2018). Transcriptome and epigenome landscape of human cortical development modeled in organoids. *Science* 362.

Andrae, J., Hansson, I., Afink, G.B., and Nister, M. (2001). Platelet-derived growth factor receptor-alpha in ventricular zone cells and in developing neurons. *Mol Cell Neurosci* 17, 1001-1013.

Androutsellis-Theotokis, A., Leker, R.R., Soldner, F., Hoepfner, D.J., Ravin, R., Poser, S.W., Rueger, M.A., Bae, S.K., Kittappa, R., and McKay, R.D. (2006). Notch signalling regulates stem cell numbers in vitro and in vivo. *Nature* 442, 823-826.

Androutsellis-Theotokis, A., Murase, S., Boyd, J.D., Park, D.M., Hoepfner, D.J., Ravin, R., and McKay, R.D. (2008). Generating neurons from stem cells. *Methods Mol Biol* 438, 31-38.

Angevine, J.B., Jr., and Sidman, R.L. (1961). Autoradiographic study of cell migration during histogenesis of cerebral cortex in the mouse. *Nature* 192, 766-768.

Armentano, M., Chou, S.J., Tomassy, G.S., Leingartner, A., O'Leary, D.D., and Studer, M. (2007). COUP-TFI regulates the balance of cortical patterning between frontal/motor and sensory areas. *Nat Neurosci* 10, 1277-1286.

Arnold, S.J., Huang, G.J., Cheung, A.F., Era, T., Nishikawa, S., Bikoff, E.K., Molnar, Z., Robertson, E.J., and Groszer, M. (2008). The T-box transcription factor Eomes/Tbr2 regulates neurogenesis in the cortical subventricular zone. *Genes Dev* 22, 2479-2484.

Assimacopoulos, S., Grove, E.A., and Ragsdale, C.W. (2003). Identification of a Pax6-dependent epidermal growth factor family signaling source at the lateral edge of the embryonic cerebral cortex. *J Neurosci* 23, 6399-6403.

Bakken, T.E., Miller, J.A., Ding, S.L., Sunkin, S.M., Smith, K.A., Ng, L., Szafer, A., Dalley, R.A., Royall, J.J., Lemon, T., *et al.* (2016). A comprehensive transcriptional map of primate brain development. *Nature* 535, 367-375.

Bishop, K.M., Goudreau, G., and O'Leary, D.D. (2000). Regulation of area identity in the mammalian neocortex by Emx2 and Pax6. *Science* 288, 344-349.



Brennand, K., Savas, J.N., Kim, Y., Tran, N., Simone, A., Hashimoto-Torii, K., Beaumont, K.G., Kim, H.J., Topol, A., Ladrán, I., *et al.* (2015). Phenotypic differences in hiPSC NPCs derived from patients with schizophrenia. *Mol Psychiatry* 20, 361-368.

Bulchand, S., Grove, E.A., Porter, F.D., and Tole, S. (2001). LIM-homeodomain gene *Lhx2* regulates the formation of the cortical hem. *Mech Dev* 100, 165-175.

Burrows, R.C., Wancio, D., Levitt, P., and Lillien, L. (1997). Response diversity and the timing of progenitor cell maturation are regulated by developmental changes in EGFR expression in the cortex. *Neuron* 19, 251-267.

Butler, A., Hoffman, P., Smibert, P., Papalexi, E., and Satija, R. (2018). Integrating single-cell transcriptomic data across different conditions, technologies, and species. *Nat Biotechnol* 36, 411-420.

Bystron, I., Blakemore, C., and Rakic, P. (2008). Development of the human cerebral cortex: Boulder Committee revisited. *Nat Rev Neurosci* 9, 110-122.

Carcamo-Orive, I., Hoffman, G.E., Cundiff, P., Beckmann, N.D., D'Souza, S.L., Knowles, J.W., Patel, A., Papatsenko, D., Abbasi, F., Reaven, G.M., *et al.* (2017). Analysis of Transcriptional Variability in a Large Human iPSC Library Reveals Genetic and Non-genetic Determinants of Heterogeneity. *Cell Stem Cell* 20, 518-532 e519.

Caronia-Brown, G., Yoshida, M., Gulden, F., Assimacopoulos, S., and Grove, E.A. (2014). The cortical hem regulates the size and patterning of neocortex. *Development* 141, 2855-2865.

Cattaneo, E., and McKay, R. (1990). Proliferation and differentiation of neuronal stem cells regulated by nerve growth factor. *Nature* 347, 762-765.

Chambers, S.M., Fasano, C.A., Papapetrou, E.P., Tomishima, M., Sadelain, M., and Studer, L. (2009). Highly efficient neural conversion of human ES and iPS cells by dual inhibition of SMAD signaling. *Nat Biotechnol* 27, 275-280.

Chen, K.G., Mallon, B.S., Hamilton, R.S., Kozhich, O.A., Park, K., Hoepfner, D.J., Robey, P.G., and McKay, R.D. (2012). Non-colony type monolayer culture of human embryonic stem cells. *Stem cell research* 9, 237-248.

Chizhikov, V.V., Lindgren, A.G., Mishima, Y., Roberts, R.W., Aldinger, K.A., Miesegaes, G.R., Currie, D.S., Monuki, E.S., and Millen, K.J. (2010). *Lmx1a* regulates fates and location of cells

originating from the cerebellar rhombic lip and telencephalic cortical hem. *Proc Natl Acad Sci U S A* 107, 10725-10730.

Cholfin, J.A., and Rubenstein, J.L. (2007). Patterning of frontal cortex subdivisions by Fgf17. *Proc Natl Acad Sci U S A* 104, 7652-7657.

Consortium, H.D.i. (2017). Developmental alterations in Huntington's disease neural cells and pharmacological rescue in cells and mice. *Nat Neurosci* 20, 648-660.

Crawley, J.N., Heyer, W.D., and LaSalle, J.M. (2016). Autism and Cancer Share Risk Genes, Pathways, and Drug Targets. *Trends Genet* 32, 139-146.

de la Torre-Ubieta, L., Stein, J.L., Won, H., Opland, C.K., Liang, D., Lu, D., and Geschwind, D.H. (2018). The Dynamic Landscape of Open Chromatin during Human Cortical Neurogenesis. *Cell* 172, 289-304 e218.

Di Pasquale, G., Davidson, B.L., Stein, C.S., Martins, I., Scudiero, D., Monks, A., and Chiorini, J.A. (2003). Identification of PDGFR as a receptor for AAV-5 transduction. *Nat Med* 9, 1306-1312.

Edri, R., Yaffe, Y., Ziller, M.J., Mutukula, N., Volkman, R., David, E., Jacob-Hirsch, J., Malcov, H., Levy, C., Rechavi, G., *et al.* (2015). Analysing human neural stem cell ontogeny by consecutive isolation of Notch active neural progenitors. *Nat Commun* 6, 6500.

Englund, C., Fink, A., Lau, C., Pham, D., Daza, R.A., Bulfone, A., Kowalczyk, T., and Hevner, R.F. (2005). Pax6, Tbr2, and Tbr1 are expressed sequentially by radial glia, intermediate progenitor cells, and postmitotic neurons in developing neocortex. *J Neurosci* 25, 247-251.

Ernst, C. (2016). Proliferation and Differentiation Deficits are a Major Convergence Point for Neurodevelopmental Disorders. *Trends Neurosci* 39, 290-299.

Fertig, E.J., Ding, J., Favorov, A.V., Parmigiani, G., and Ochs, M.F. (2010). CoGAPS: an R/C++ package to identify patterns and biological process activity in transcriptomic data. *Bioinformatics* 26, 2792-2793.

Fertig, E.J., Ren, Q., Cheng, H., Hatakeyama, H., Dicker, A.P., Rodeck, U., Considine, M., Ochs, M.F., and Chung, C.H. (2012). Gene expression signatures modulated by epidermal growth factor receptor activation and their relationship to cetuximab resistance in head and neck squamous cell carcinoma. *BMC Genomics* 13, 160.

Fertig, E.J., Stein-O'Brien, G., Jaffe, A., and Colantuoni, C. (2014). Pattern identification in time-course gene expression data with the CoGAPS matrix factorization. *Methods Mol Biol* 1101, 87-112.

Fujimori, K., Ishikawa, M., Otomo, A., Atsuta, N., Nakamura, R., Akiyama, T., Hadano, S., Aoki, M., Saya, H., Sobue, G., *et al.* (2018). Modeling sporadic ALS in iPSC-derived motor neurons identifies a potential therapeutic agent. *Nat Med* 24, 1579-1589.

Fukuchi-Shimogori, T., and Grove, E.A. (2001). Neocortex patterning by the secreted signaling molecule FGF8. *Science* 294, 1071-1074.

Geschwind, D.H., and Rakic, P. (2013). Cortical evolution: judge the brain by its cover. *Neuron* 80, 633-647.

Glinka, A., Wu, W., Delius, H., Monaghan, A.P., Blumenstock, C., and Niehrs, C. (1998). Dickkopf-1 is a member of a new family of secreted proteins and functions in head induction. *Nature* 391, 357-362.

Grove, E.A., and Fukuchi-Shimogori, T. (2003). Generating the cerebral cortical area map. *Annu Rev Neurosci* 26, 355-380.

Grove, E.A., Tole, S., Limon, J., Yip, L., and Ragsdale, C.W. (1998). The hem of the embryonic cerebral cortex is defined by the expression of multiple Wnt genes and is compromised in Gli3-deficient mice. *Development* 125, 2315-2325.

Gulsuner, S., Walsh, T., Watts, A.C., Lee, M.K., Thornton, A.M., Casadei, S., Rippey, C., Shahin, H., Consortium on the Genetics of, S., Group, P.S., *et al.* (2013). Spatial and temporal mapping of de novo mutations in schizophrenia to a fetal prefrontal cortical network. *Cell* 154, 518-529.

Hanashima, C., Fernandes, M., Hebert, J.M., and Fishell, G. (2007). The role of Foxg1 and dorsal midline signaling in the generation of Cajal-Retzius subtypes. *J Neurosci* 27, 11103-11111.

Hansen, D.V., Lui, J.H., Parker, P.R., and Kriegstein, A.R. (2010). Neurogenic radial glia in the outer subventricular zone of human neocortex. *Nature* 464, 554-561.

Hansen, N., Grunewald, B., Weishaupt, A., Colaco, M.N., Toyka, K.V., Sommer, C., and Geis, C. (2013). Human Stiff person syndrome IgG-containing high-titer anti-GAD65 autoantibodies induce motor dysfunction in rats. *Exp Neurol* 239, 202-209.

Hendrickx, M., Van, X.H., and Leyns, L. (2009). Anterior-posterior patterning of neural differentiated embryonic stem cells by canonical Wnts, Fgfs, Bmp4 and their respective antagonists. *Dev Growth Differ* 51, 687-698.

Hubler, Z., Allimuthu, D., Bederman, I., Elitt, M.S., Madhavan, M., Allan, K.C., Shick, H.E., Garrison, E., M, T.K., Factor, D.C., *et al.* (2018). Accumulation of 8,9-unsaturated sterols drives oligodendrocyte formation and remyelination. *Nature* 560, 372-376.

Jackson, E.L., Garcia-Verdugo, J.M., Gil-Perotin, S., Roy, M., Quinones-Hinojosa, A., VandenBerg, S., and Alvarez-Buylla, A. (2006). PDGFR alpha-positive B cells are neural stem cells in the adult SVZ that form glioma-like growths in response to increased PDGF signaling. *Neuron* 51, 187-199.

Jaffe, A.E., Straub, R.E., Shin, J.H., Tao, R., Gao, Y., Collado-Torres, L., Kam-Thong, T., Xi, H.S., Quan, J., Chen, Q., *et al.* (2018). Developmental and genetic regulation of the human cortex transcriptome illuminate schizophrenia pathogenesis. *Nat Neurosci* 21, 1117-1125.

Johe, K.K., Hazel, T.G., Muller, T., Dugich-Djordjevic, M.M., and McKay, R.D. (1996). Single factors direct the differentiation of stem cells from the fetal and adult central nervous system. *Genes Dev* 10, 3129-3140.

Kanton, S., Boyle, M.J., He, Z., Santel, M., Weigert, A., Sanchis-Calleja, F., Guijarro, P., Sidow, L., Fleck, J.S., Han, D., *et al.* (2019). Organoid single-cell genomic atlas uncovers human-specific features of brain development. *Nature* 574, 418-422.

Kim, J.H., Auerbach, J.M., Rodriguez-Gomez, J.A., Velasco, I., Gavin, D., Lumelsky, N., Lee, S.H., Nguyen, J., Sanchez-Pernaute, R., Bankiewicz, K., *et al.* (2002). Dopamine neurons derived from embryonic stem cells function in an animal model of Parkinson's disease. *Nature* 418, 50-56.

Korada, S., Zheng, W., Basilico, C., Schwartz, M.L., and Vaccarino, F.M. (2002). Fibroblast growth factor 2 is necessary for the growth of glutamate projection neurons in the anterior neocortex. *J Neurosci* 22, 863-875.

Kwan, K.Y., Lam, M.M., Johnson, M.B., Dube, U., Shim, S., Rasin, M.R., Sousa, A.M., Fertuzinhos, S., Chen, J.G., Arellano, J.I., *et al.* (2012a). Species-dependent posttranscriptional regulation of NOS1 by FMRP in the developing cerebral cortex. *Cell* 149, 899-911.

Kwan, K.Y., Sestan, N., and Anton, E.S. (2012b). Transcriptional co-regulation of neuronal migration and laminar identity in the neocortex. *Development* 139, 1535-1546.

Lang, C., Campbell, K.R., Ryan, B.J., Carling, P., Attar, M., Vowles, J., Perestenko, O.V., Bowden, R., Baig, F., Kasten, M., *et al.* (2018). Single-Cell Sequencing of iPSC-Dopamine Neurons Reconstructs Disease Progression and Identifies HDAC4 as a Regulator of Parkinson Cell Phenotypes. *Cell Stem Cell*.

Lehtinen, M.K., Zappaterra, M.W., Chen, X., Yang, Y.J., Hill, A.D., Lun, M., Maynard, T., Gonzalez, D., Kim, S., Ye, P., *et al.* (2011). The cerebrospinal fluid provides a proliferative niche for neural progenitor cells. *Neuron* 69, 893-905.

Lein, E.S., Belgard, T.G., Hawrylycz, M., and Molnar, Z. (2017). Transcriptomic Perspectives on Neocortical Structure, Development, Evolution, and Disease. *Annu Rev Neurosci* 40, 629-652.

Li, M., Santpere, G., Imamura Kawasawa, Y., Evgrafov, O.V., Gulden, F.O., Pochareddy, S., Sunkin, S.M., Li, Z., Shin, Y., Zhu, Y., *et al.* (2018). Integrative functional genomic analysis of human brain development and neuropsychiatric risks. *Science* 362.

Li, W., Cogswell, C.A., and LoTurco, J.J. (1998). Neuronal differentiation of precursors in the neocortical ventricular zone is triggered by BMP. *J Neurosci* 18, 8853-8862.

Lillien, L., and Raphael, H. (2000). BMP and FGF regulate the development of EGF-responsive neural progenitor cells. *Development* 127, 4993-5005.

Lun, A.T.L., Riesenfeld, S., Andrews, T., Dao, T.P., Gomes, T., participants in the 1st Human Cell Atlas, J., and Marioni, J.C. (2019). EmptyDrops: distinguishing cells from empty droplets in droplet-based single-cell RNA sequencing data. *Genome Biol* 20, 63.

Mabie, P.C., Mehler, M.F., and Kessler, J.A. (1999). Multiple roles of bone morphogenetic protein signaling in the regulation of cortical cell number and phenotype. *J Neurosci* 19, 7077-7088.

Madison, J.M., Zhou, F., Nigam, A., Hussain, A., Barker, D.D., Nehme, R., van der Ven, K., Hsu, J., Wolf, P., Fleishman, M., *et al.* (2015). Characterization of bipolar disorder patient-specific induced pluripotent stem cells from a family reveals neurodevelopmental and mRNA expression abnormalities. *Mol Psychiatry* 20, 703-717.

Malatesta, P., Hartfuss, E., and Gotz, M. (2000). Isolation of radial glial cells by fluorescent-activated cell sorting reveals a neuronal lineage. *Development* 127, 5253-5263.

Mangale, V.S., Hirokawa, K.E., Satyaki, P.R., Gokulchandran, N., Chikbire, S., Subramanian, L., Shetty, A.S., Martynoga, B., Paul, J., Mai, M.V., *et al.* (2008). Lhx2 selector activity specifies cortical identity and suppresses hippocampal organizer fate. *Science* 319, 304-309.

Marchetto, M.C., Belinson, H., Tian, Y., Freitas, B.C., Fu, C., Vadodaria, K.C., Beltrao-Braga, P.C., Trujillo, C.A., Mendes, A.P., Padmanabhan, K., *et al.* (2016). Altered proliferation and networks in neural cells derived from idiopathic autistic individuals. *Mol Psychiatry*.

Mariani, J., Coppola, G., Zhang, P., Abyzov, A., Provini, L., Tomasini, L., Amenduni, M., Szekely, A., Palejev, D., Wilson, M., *et al.* (2015). FOXG1-Dependent Dysregulation of GABA/Glutamate Neuron Differentiation in Autism Spectrum Disorders. *Cell* 162, 375-390.

Mariani, J., Simonini, M.V., Palejev, D., Tomasini, L., Coppola, G., Szekely, A.M., Horvath, T.L., and Vaccarino, F.M. (2012). Modeling human cortical development in vitro using induced pluripotent stem cells. *Proc Natl Acad Sci U S A* 109, 12770-12775.

Maroof, A.M., Keros, S., Tyson, J.A., Ying, S.W., Ganat, Y.M., Merkle, F.T., Liu, B., Goulburn, A., Stanley, E.G., Elefanty, A.G., *et al.* (2013). Directed differentiation and functional maturation of cortical interneurons from human embryonic stem cells. *Cell Stem Cell* 12, 559-572.

Marques, S., Zeisel, A., Codeluppi, S., van Bruggen, D., Mendanha Falcao, A., Xiao, L., Li, H., Haring, M., Hochgerner, H., Romanov, R.A., *et al.* (2016). Oligodendrocyte heterogeneity in the mouse juvenile and adult central nervous system. *Science* 352, 1326-1329.

Miller, J.A., Ding, S.L., Sunkin, S.M., Smith, K.A., Ng, L., Szafer, A., Ebbert, A., Riley, Z.L., Royall, J.J., Aiona, K., *et al.* (2014). Transcriptional landscape of the prenatal human brain. *Nature* 508, 199-206.

Miyashita-Lin, E.M., Hevner, R., Wassarman, K.M., Martinez, S., and Rubenstein, J.L. (1999). Early neocortical regionalization in the absence of thalamic innervation. *Science* 285, 906-909.

Mo, Z., and Zecevic, N. (2008). Is Pax6 critical for neurogenesis in the human fetal brain? *Cereb Cortex* 18, 1455-1465.

Molyneaux, B.J., Arlotta, P., Menezes, J.R., and Macklis, J.D. (2007). Neuronal subtype specification in the cerebral cortex. *Nat Rev Neurosci* 8, 427-437.

Monuki, E.S., Porter, F.D., and Walsh, C.A. (2001). Patterning of the dorsal telencephalon and cerebral cortex by a roof plate-Lhx2 pathway. *Neuron* 32, 591-604.

Nakagawa, Y., Johnson, J.E., and O'Leary, D.D. (1999). Graded and areal expression patterns of regulatory genes and cadherins in embryonic neocortex independent of thalamocortical input. *J Neurosci* 19, 10877-10885.

Namba, T., and Huttner, W.B. (2017). Neural progenitor cells and their role in the development and evolutionary expansion of the neocortex. *Wiley Interdiscip Rev Dev Biol* 6.

Nishizawa, M., Chonabayashi, K., Nomura, M., Tanaka, A., Nakamura, M., Inagaki, A., Nishikawa, M., Takei, I., Oishi, A., Tanabe, K., *et al.* (2016). Epigenetic Variation between Human Induced Pluripotent Stem Cell Lines Is an Indicator of Differentiation Capacity. *Cell Stem Cell* 19, 341-354.

Noctor, S.C., Flint, A.C., Weissman, T.A., Dammerman, R.S., and Kriegstein, A.R. (2001). Neurons derived from radial glial cells establish radial units in neocortex. *Nature* 409, 714-720.

Nowakowski, T.J., Bhaduri, A., Pollen, A.A., Alvarado, B., Mostajo-Radji, M.A., Di Lullo, E., Haeussler, M., Sandoval-Espinosa, C., Liu, S.J., Velmeshev, D., *et al.* (2017). Spatiotemporal gene expression trajectories reveal developmental hierarchies of the human cortex. *Science* 358, 1318-1323.

Nowakowski, T.J., Pollen, A.A., Sandoval-Espinosa, C., and Kriegstein, A.R. (2016). Transformation of the Radial Glia Scaffold Demarcates Two Stages of Human Cerebral Cortex Development. *Neuron* 91, 1219-1227.

O'Leary, D.D., Chou, S.J., and Sahara, S. (2007). Area patterning of the mammalian cortex. *Neuron* 56, 252-269.

Okabe, S., Forsberg-Nilsson, K., Spiro, A.C., Segal, M., and McKay, R.D. (1996). Development of neuronal precursor cells and functional postmitotic neurons from embryonic stem cells in vitro. *Mech Dev* 59, 89-102.

Parikshak, N.N., Luo, R., Zhang, A., Won, H., Lowe, J.K., Chandran, V., Horvath, S., and Geschwind, D.H. (2013). Integrative functional genomic analyses implicate specific molecular pathways and circuits in autism. *Cell* 155, 1008-1021.

Park, J.K., Williams, B.P., Alberta, J.A., and Stiles, C.D. (1999). Bipotent cortical progenitor cells process conflicting cues for neurons and glia in a hierarchical manner. *J Neurosci* 19, 10383-10389.

Pasca, S.P. (2018). The rise of three-dimensional human brain cultures. *Nature* 553, 437-445.

Pollen, A.A., Nowakowski, T.J., Chen, J., Retallack, H., Sandoval-Espinosa, C., Nicholas, C.R., Shuga, J., Liu, S.J., Oldham, M.C., Diaz, A., *et al.* (2015). Molecular identity of human outer radial glia during cortical development. *Cell* 163, 55-67.

Pruitt, K.D., Brown, G.R., Hiatt, S.M., Thibaud-Nissen, F., Astashyn, A., Ermolaeva, O., Farrell, C.M., Hart, J., Landrum, M.J., McGarvey, K.M., *et al.* (2014). RefSeq: an update on mammalian reference sequences. *Nucleic Acids Res* 42, D756-763.

Qi, Y., Zhang, X.J., Renier, N., Wu, Z., Atkin, T., Sun, Z., Ozair, M.Z., Tchieu, J., Zimmer, B., Fattahi, F., *et al.* (2017). Combined small-molecule inhibition accelerates the derivation of functional cortical neurons from human pluripotent stem cells. *Nat Biotechnol* 35, 154-163.

Raballo, R., Rhee, J., Lyn-Cook, R., Leckman, J.F., Schwartz, M.L., and Vaccarino, F.M. (2000). Basic fibroblast growth factor (Fgf2) is necessary for cell proliferation and neurogenesis in the developing cerebral cortex. *J Neurosci* 20, 5012-5023.

Rakic, P. (1974). Neurons in rhesus monkey visual cortex: systematic relation between time of origin and eventual disposition. *Science* 183, 425-427.

Rakic, P. (1988). Specification of cerebral cortical areas. *Science* 241, 170-176.

Rash, B.G., Duque, A., Morozov, Y.M., Arellano, J.I., Micali, N., and Rakic, P. (2019). Gliogenesis in the outer subventricular zone promotes enlargement and gyrification of the primate cerebrum. *Proc Natl Acad Sci U S A* 116, 7089-7094.

Rash, B.G., Lim, H.D., Breunig, J.J., and Vaccarino, F.M. (2011). FGF signaling expands embryonic cortical surface area by regulating Notch-dependent neurogenesis. *J Neurosci* 31, 15604-15617.

Rash, B.G., Tomasi, S., Lim, H.D., Suh, C.Y., and Vaccarino, F.M. (2013). Cortical gyrification induced by fibroblast growth factor 2 in the mouse brain. *J Neurosci* 33, 10802-10814.

Ravin, R., Hoepfner, D.J., Munno, D.M., Carmel, L., Sullivan, J., Levitt, D.L., Miller, J.L., Athaide, C., Panchision, D.M., and McKay, R.D. (2008). Potency and fate specification in CNS stem cell populations in vitro. *Cell Stem Cell* 3, 670-680.

Renner, M., Lancaster, M.A., Bian, S., Choi, H., Ku, T., Peer, A., Chung, K., and Knoblich, J.A. (2017). Self-organized developmental patterning and differentiation in cerebral organoids. *EMBO J* 36, 1316-1329.

Sakaguchi, H., Kadoshima, T., Soen, M., Narii, N., Ishida, Y., Ohgushi, M., Takahashi, J., Eiraku, M., and Sasai, Y. (2015). Generation of functional hippocampal neurons from self-organizing human embryonic stem cell-derived dorsomedial telencephalic tissue. *Nat Commun* 6, 8896.



Sandberg, M., Flandin, P., Silberberg, S., Su-Feher, L., Price, J.D., Hu, J.S., Kim, C., Visel, A., Nord, A.S., and Rubenstein, J.L. (2016). Transcriptional Networks Controlled by NKX2-1 in the Development of Forebrain GABAergic Neurons. *Neuron* 91, 1260-1275.

Saxena, M., Agnihotri, N., and Sen, J. (2018). Perturbation of canonical and non-canonical BMP signaling affects migration, polarity and dendritogenesis of mouse cortical neurons. *Development* 145.

Schafer, S.T., Paquola, A.C.M., Stern, S., Gosselin, D., Ku, M., Pena, M., Kuret, T.J.M., Liyanage, M., Mansour, A.A., Jaeger, B.N., *et al.* (2019). Pathological priming causes developmental gene network heterochronicity in autistic subject-derived neurons. *Nat Neurosci* 22, 243-255.

Shen, Q., Wang, Y., Dimos, J.T., Fasano, C.A., Phoenix, T.N., Lemischka, I.R., Ivanova, N.B., Stifani, S., Morrisey, E.E., and Temple, S. (2006). The timing of cortical neurogenesis is encoded within lineages of individual progenitor cells. *Nat Neurosci* 9, 743-751.

Shi, Y., Kirwan, P., Smith, J., Robinson, H.P., and Livesey, F.J. (2012). Human cerebral cortex development from pluripotent stem cells to functional excitatory synapses. *Nat Neurosci* 15, 477-486, S471.

Shimogori, T., and Grove, E.A. (2005). Fibroblast growth factor 8 regulates neocortical guidance of area-specific thalamic innervation. *J Neurosci* 25, 6550-6560.

State, M.W., and Sestan, N. (2012). Neuroscience. The emerging biology of autism spectrum disorders. *Science* 337, 1301-1303.

Stein-O'Brien, G.L., Carey, J.L., Lee, W.S., Considine, M., Favorov, A.V., Flam, E., Guo, T., Li, S., Marchionni, L., Sherman, T., *et al.* (2017). PatternMarkers & GWCoGAPS for novel data-driven biomarkers via whole transcriptome NMF. *Bioinformatics*.

Stein-O'Brien, G.L., Clark, B.S., Sherman, T., Zibetti, C., Hu, Q., Sealfon, R., Liu, S., Qian, J., Colantuoni, C., Blackshaw, S., *et al.* (2019). Decomposing Cell Identity for Transfer Learning across Cellular Measurements, Platforms, Tissues, and Species. *Cell Syst* 8, 395-411 e398.

Storm, E.E., Garel, S., Borello, U., Hebert, J.M., Martinez, S., McConnell, S.K., Martin, G.R., and Rubenstein, J.L. (2006). Dose-dependent functions of Fgf8 in regulating telencephalic patterning centers. *Development* 133, 1831-1844.

Stuart, T., Butler, A., Hoffman, P., Hafemeister, C., Papalexi, E., Mauck, W.M., 3rd, Hao, Y., Stoeckius, M., Smibert, P., and Satija, R. (2019). Comprehensive Integration of Single-Cell Data. *Cell* 177, 1888-1902 e1821.

Sun, Y., Goderie, S.K., and Temple, S. (2005). Asymmetric distribution of EGFR receptor during mitosis generates diverse CNS progenitor cells. *Neuron* 45, 873-886.

Sur, M., and Rubenstein, J.L. (2005). Patterning and plasticity of the cerebral cortex. *Science* 310, 805-810.

Tiberi, L., Vanderhaeghen, P., and van den Aemele, J. (2012). Cortical neurogenesis and morphogens: diversity of cues, sources and functions. *Curr Opin Cell Biol* 24, 269-276.

Vaccarino, F.M., Schwartz, M.L., Raballo, R., Nilsen, J., Rhee, J., Zhou, M., Doetschman, T., Coffin, J.D., Wyland, J.J., and Hung, Y.T. (1999). Changes in cerebral cortex size are governed by fibroblast growth factor during embryogenesis. *Nat Neurosci* 2, 848.

van de Leemput, J., Boles, N.C., Kiehl, T.R., Corneo, B., Lederman, P., Menon, V., Lee, C., Martinez, R.A., Levi, B.P., Thompson, C.L., *et al.* (2014). CORTECON: a temporal transcriptome analysis of in vitro human cerebral cortex development from human embryonic stem cells. *Neuron* 83, 51-68.

Wamsley, B., and Fishell, G. (2017). Genetic and activity-dependent mechanisms underlying interneuron diversity. *Nat Rev Neurosci* 18, 299-309.

Wang, D., Liu, S., Warrell, J., Won, H., Shi, X., Navarro, F.C.P., Clarke, D., Gu, M., Emani, P., Yang, Y.T., *et al.* (2018). Comprehensive functional genomic resource and integrative model for the human brain. *Science* 362.

Weller, M.L., Amornphimoltham, P., Schmidt, M., Wilson, P.A., Gutkind, J.S., and Chiorini, J.A. (2010). Epidermal growth factor receptor is a co-receptor for adeno-associated virus serotype 6. *Nat Med* 16, 662-664.

Willsey, A.J., Sanders, S.J., Li, M., Dong, S., Tebbenkamp, A.T., Muhle, R.A., Reilly, S.K., Lin, L., Fertuzinhos, S., Miller, J.A., *et al.* (2013). Coexpression networks implicate human midfetal deep cortical projection neurons in the pathogenesis of autism. *Cell* 155, 997-1007.

Wolock, S.L., Lopez, R., and Klein, A.M. (2019). Scrublet: Computational Identification of Cell Doublets in Single-Cell Transcriptomic Data. *Cell Syst* 8, 281-291 e289.

Wonders, C.P., and Anderson, S.A. (2006). The origin and specification of cortical interneurons. *Nat Rev Neurosci* 7, 687-696.

Xu, X., Wells, A.B., O'Brien, D.R., Nehorai, A., and Dougherty, J.D. (2014). Cell type-specific expression analysis to identify putative cellular mechanisms for neurogenetic disorders. *J Neurosci* 34, 1420-1431.

Zhu, Y., Sousa, A.M.M., Gao, T., Skarica, M., Li, M., Santpere, G., Esteller-Cucala, P., Juan, D., Ferrandez-Peral, L., Gulden, F.O., *et al.* (2018). Spatiotemporal transcriptomic divergence across human and macaque brain development. *Science* 362.

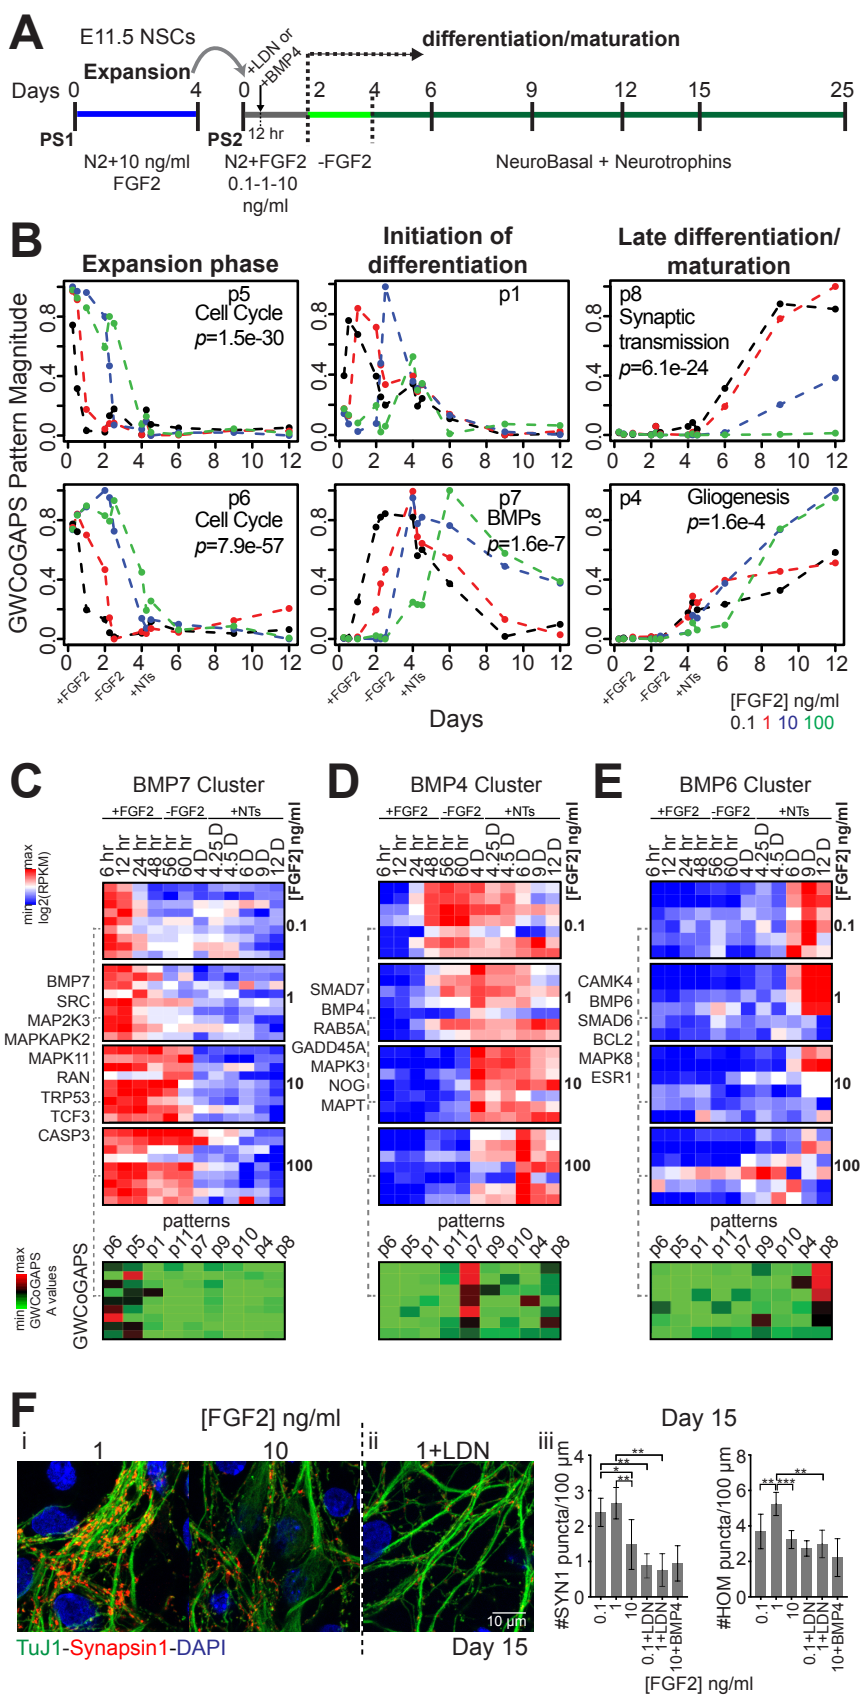

Figure 1

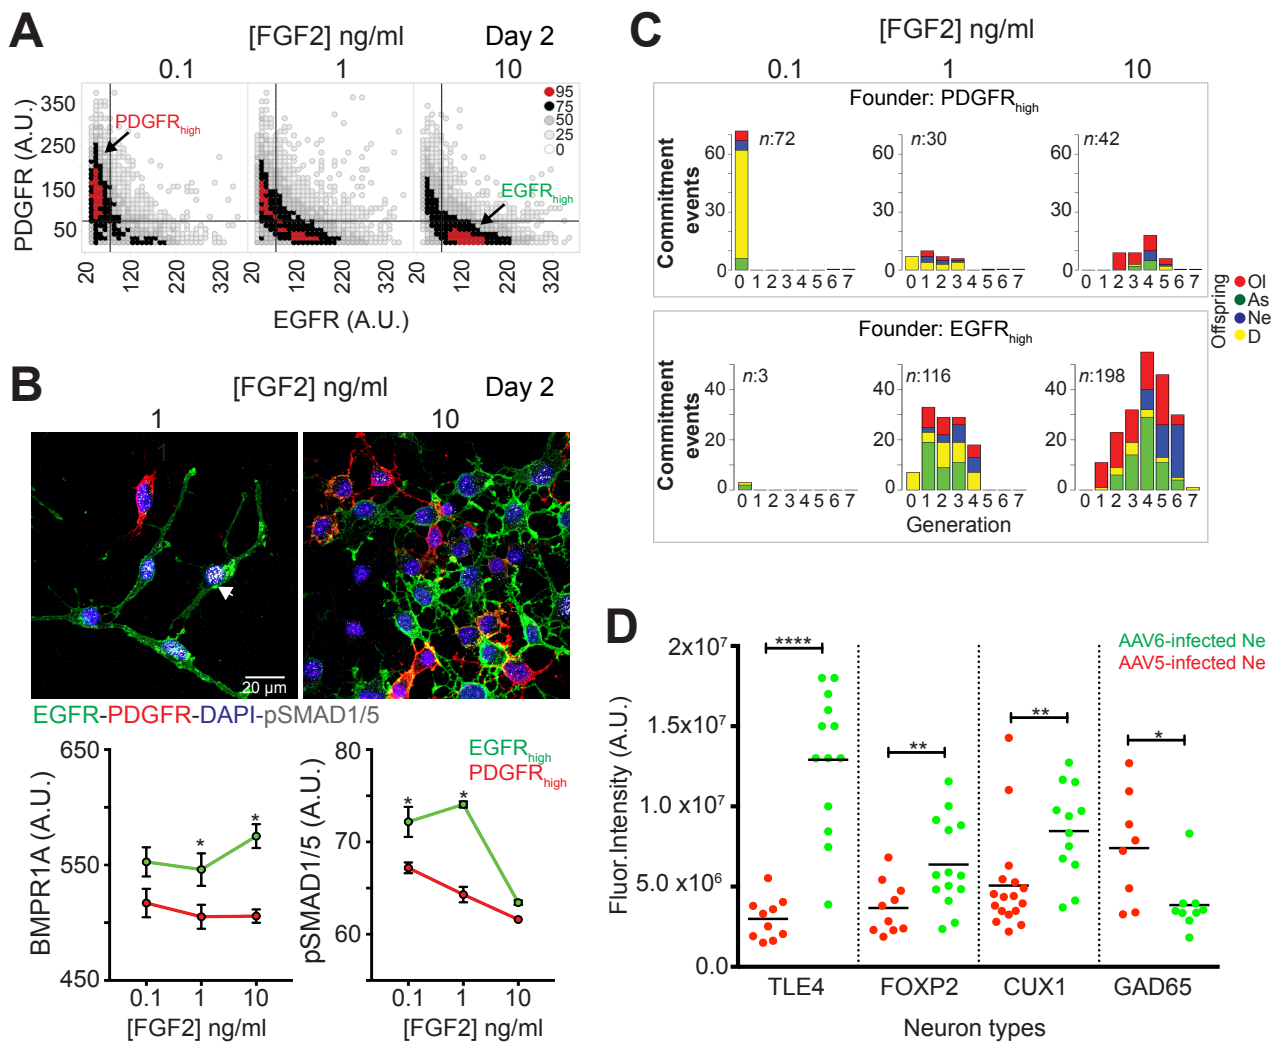

Figure 2

**A**

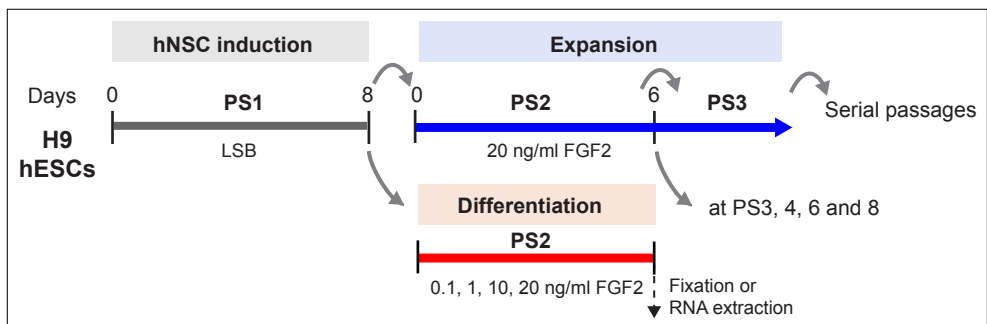

**B**

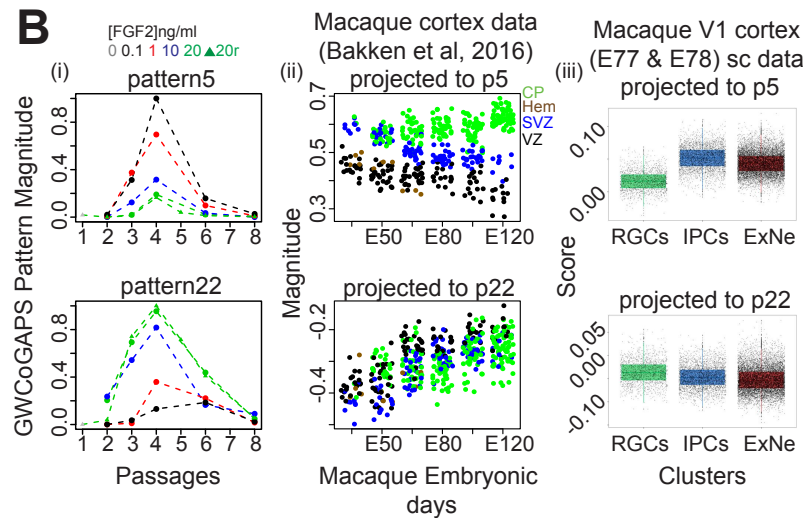

**D**

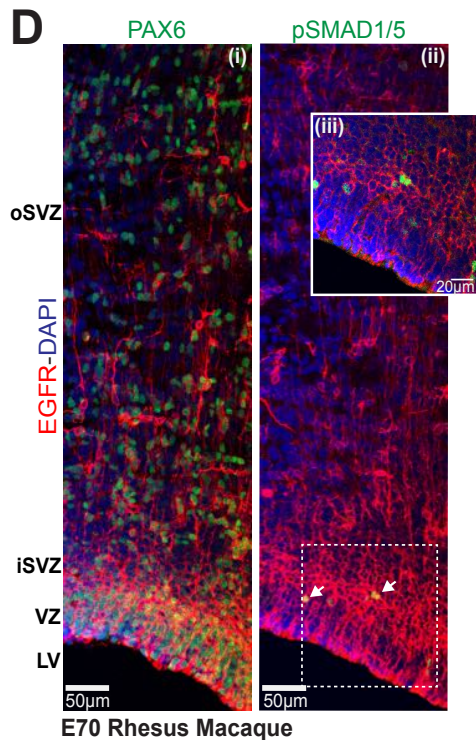

**C**

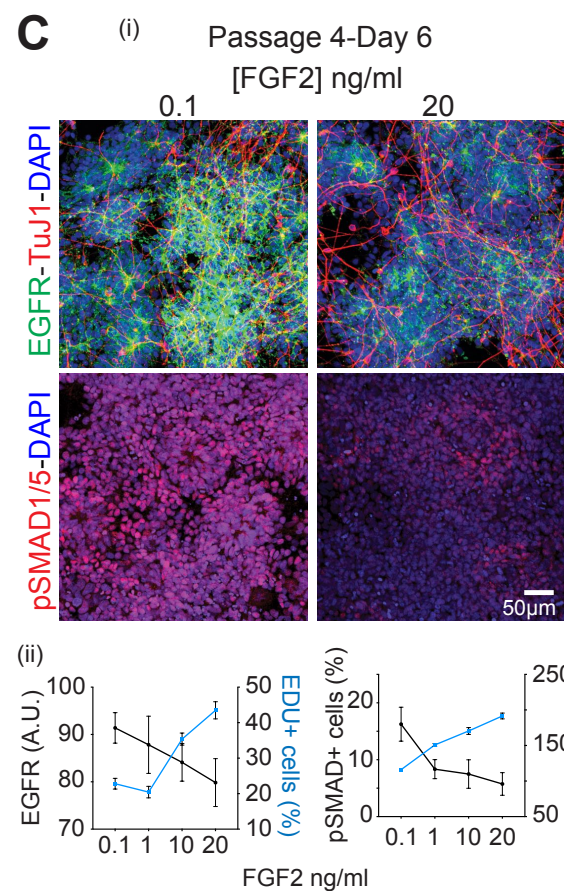

**E**

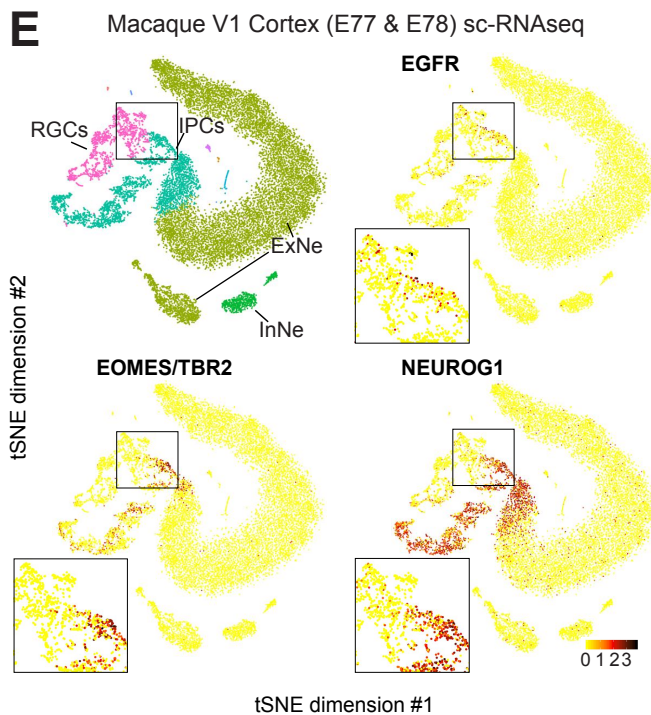

Figure 3

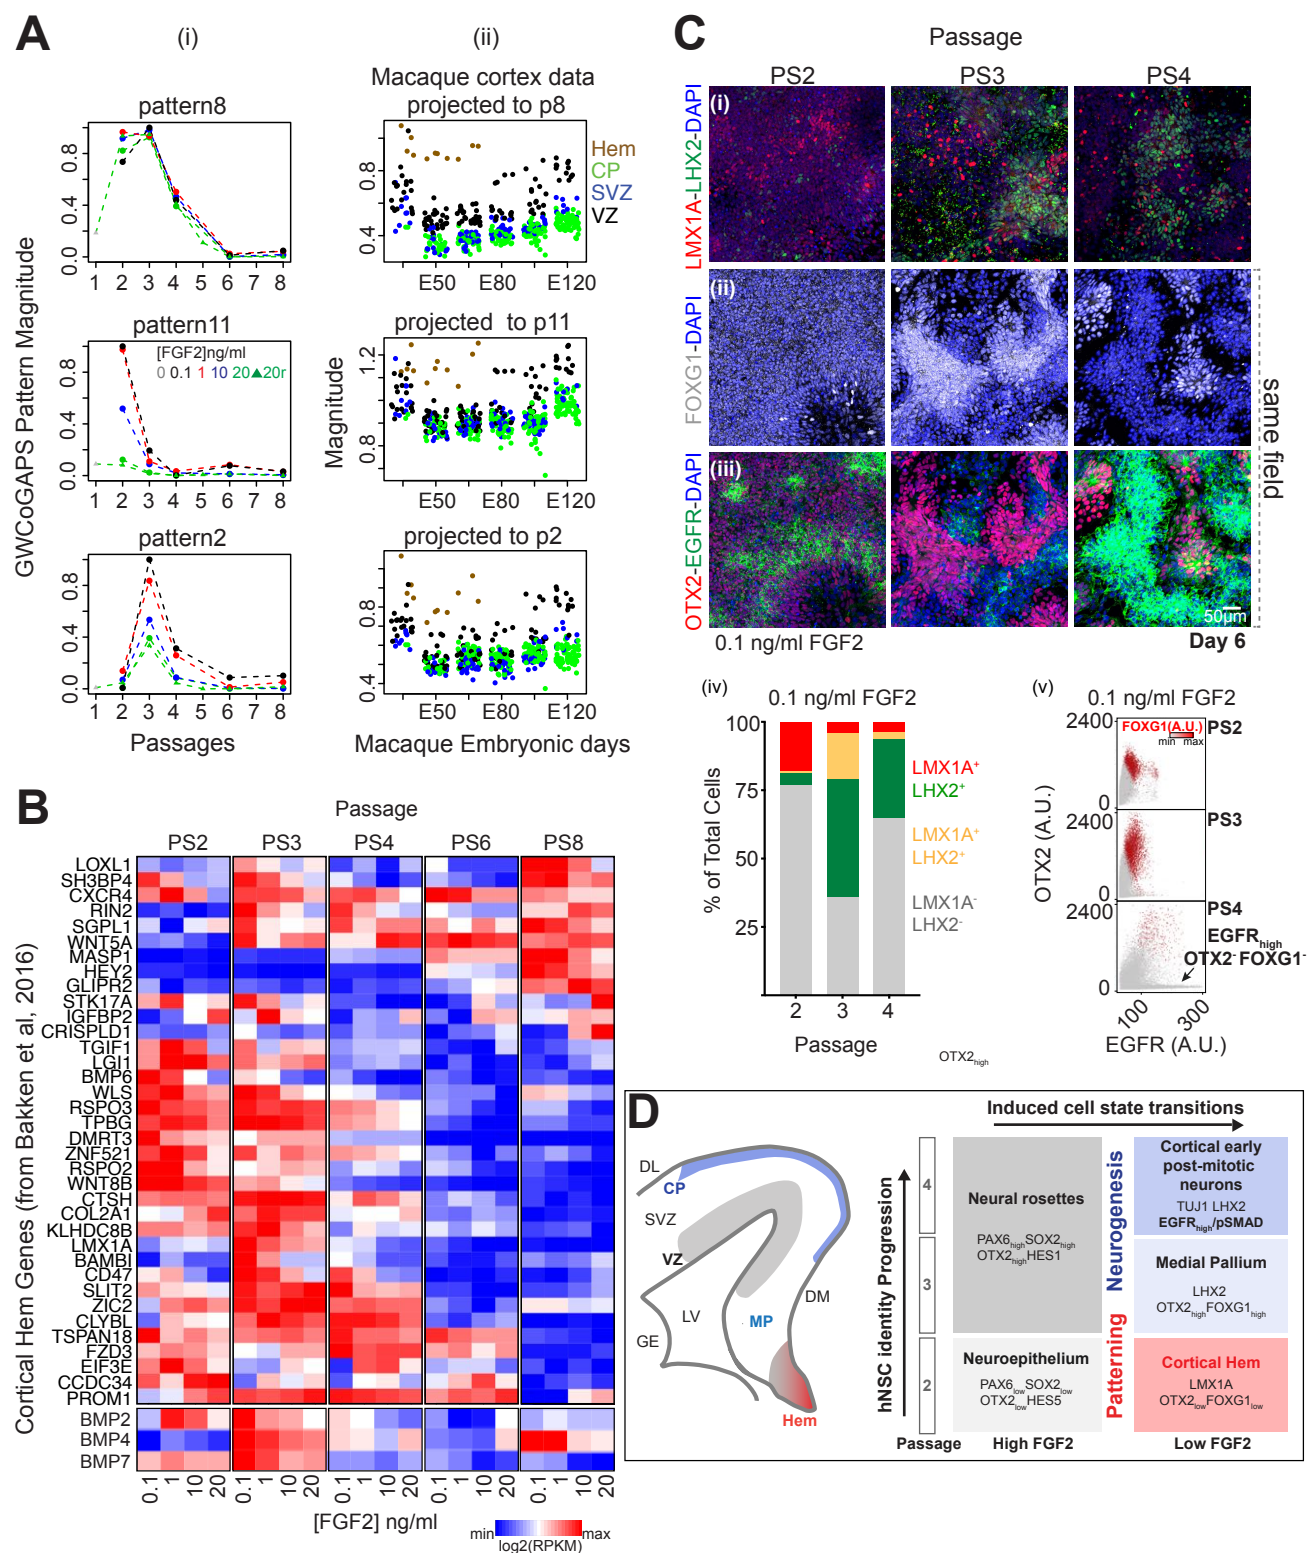

Figure 4

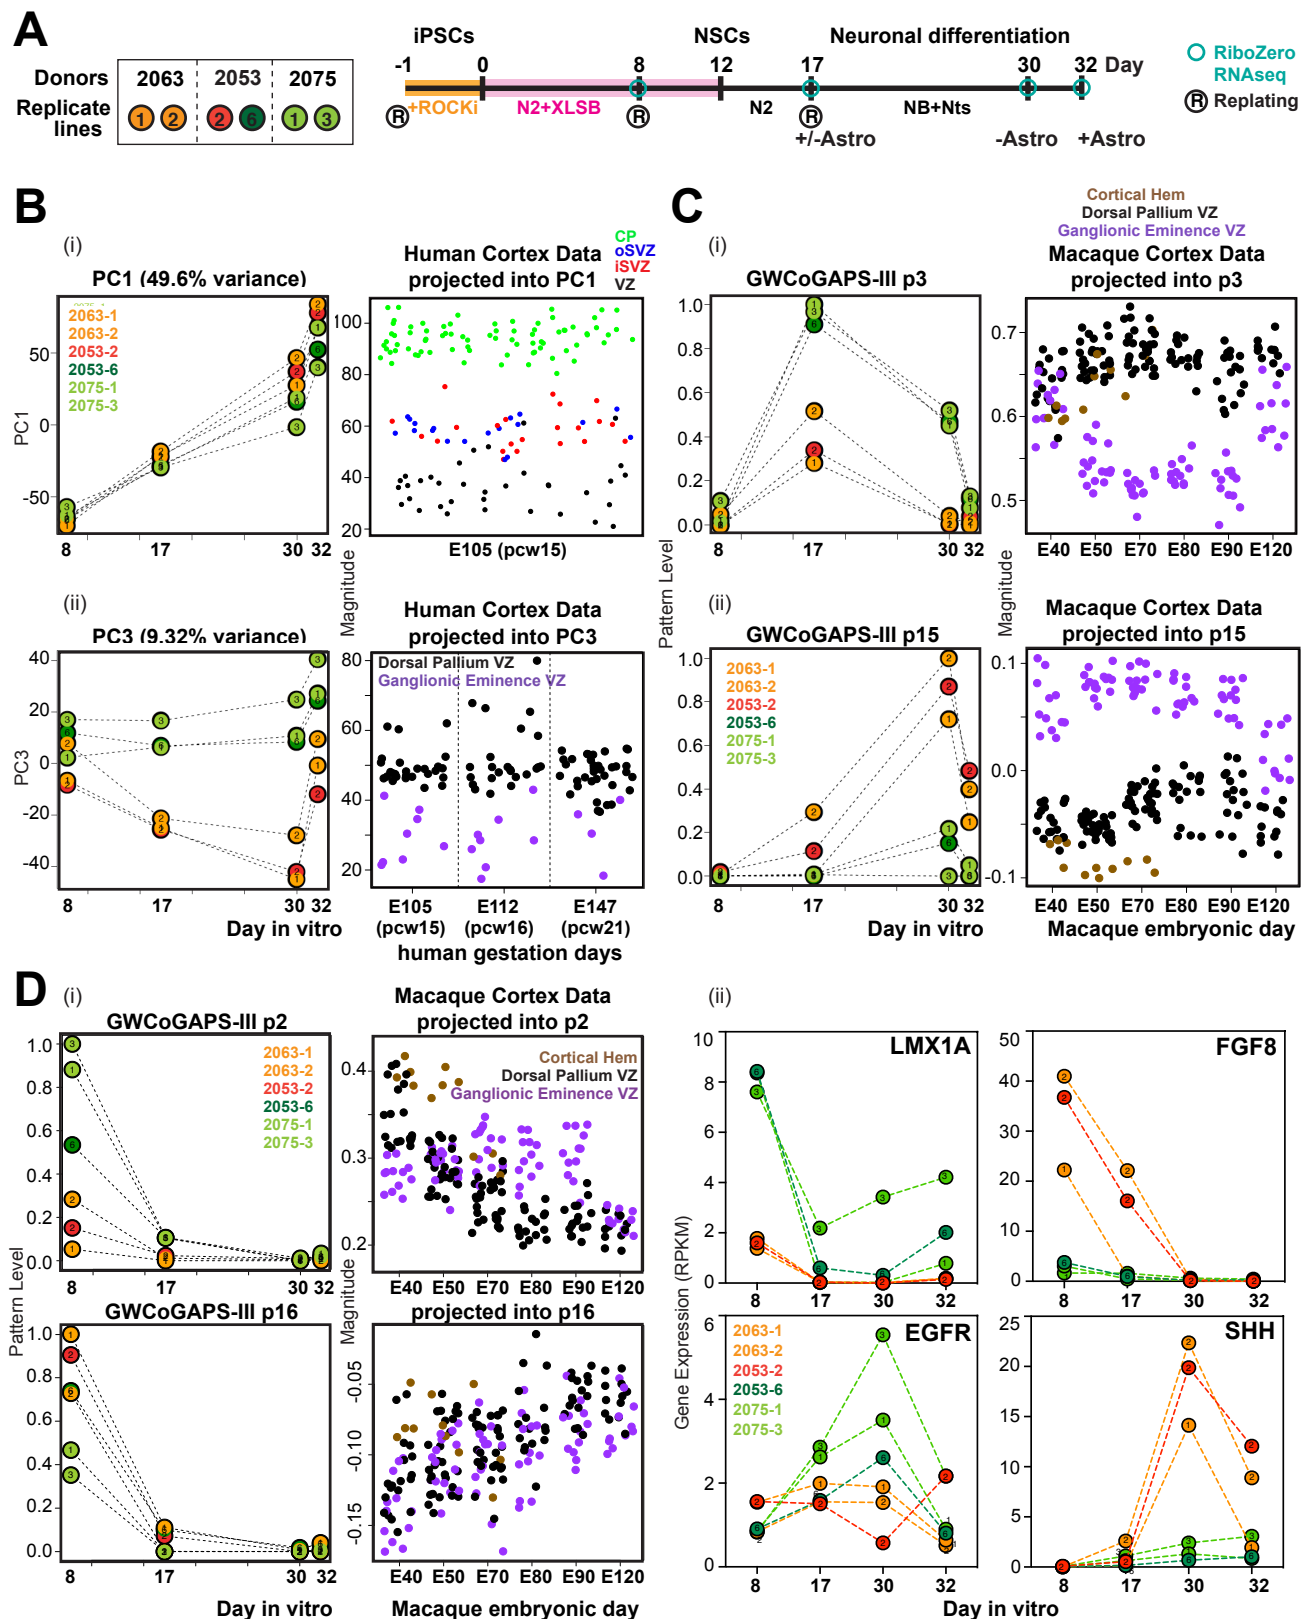

Figure 5



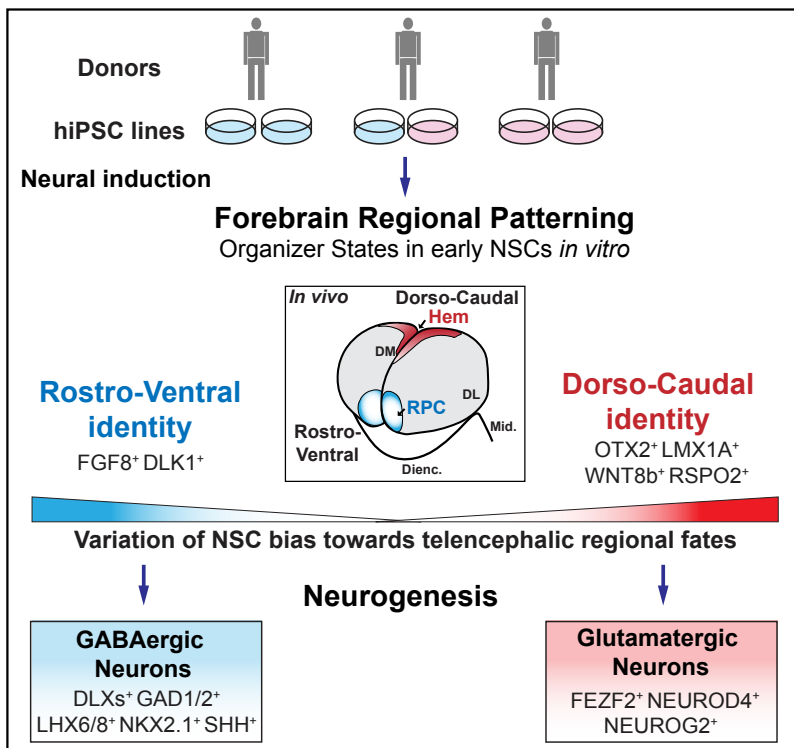

Figure 6
